# Supplementary material
Source: PubMed Central journal article supplement (PMC2593838)

# Studies on the Synthesis of Quartromicins A<sub>3</sub> and D<sub>3</sub>: Synthesis of the Vertical and Horizontal Bis-Spirotetronate Fragments

Tony K. Trullinger,<sup>a</sup> Jun Qi,<sup>a</sup> and William R. Roush\*<sup>b</sup>

<sup>a</sup> Department of Chemistry, University of Michigan, Ann Arbor, MI 48109 and

<sup>b</sup> Department of Chemistry and Biochemistry, Scripps-Florida, Jupiter, FL 33458

e-mail: [roush@scripps.edu](mailto:roush@scripps.edu)

## Supporting Information—Part 1

### Experimental Procedures for Scheme 2 Intermediates

|                                                                     | <u>Page</u> |
|---------------------------------------------------------------------|-------------|
| Procedure for synthesis of enal <b>SI-2</b>                         | SI-2        |
| Procedure for synthesis of allylic alcohol <b>9</b>                 | SI-3        |
| Procedure for synthesis of epoxy alcohol <b>SI-3</b>                | SI-3        |
| Procedure for synthesis of urethane <b>10</b>                       | SI-4        |
| Procedure for synthesis of hydroxy carbonate <b>11</b>              | SI-5        |
| Procedure for synthesis of Carbonate <b>SI-5</b>                    | SI-6        |
| Procedure for synthesis of diol <b>SI-6</b>                         | SI-7        |
| Procedure for Synthesis of □-hydroxyaldehyde <i>exo</i> - <b>8b</b> | SI-7        |
| References cited in Supporting Information                          | SI-8        |

## Supporting Information—Part 2

Copies of <sup>1</sup>H NMR spectra for new compounds

SI-9—SI-35

**General Methods:** All reaction solvents were purified before use. Tetrahydrofuran, dichloromethane, and toluene were purified by passing through a solvent column composed of activated A-1 alumina. Unless indicated, all chemicals were used as purchased without further purification.

**NMR Measurements:** Proton nuclear magnetic resonance ( $^1\text{H}$  NMR) spectra and carbon-13 ( $^{13}\text{C}$  NMR) spectra were recorded at 500 MHz and 125 MHz, respectively, or at 400 MHz and 100 MHz, respectively, on commercially available 500 MHz and 400 MHz NMR spectrometers. The proton signal of residual, non-deuterated solvent ( $\delta$  7.26 for  $\text{CHCl}_3$ ) was used as an internal reference for  $^1\text{H}$  spectra. For  $^{13}\text{C}$  spectra, chemical shifts are reported relative to the  $\delta$  77.00 resonance of  $\text{CDCl}_3$ . Coupling constants are reported in Hz.

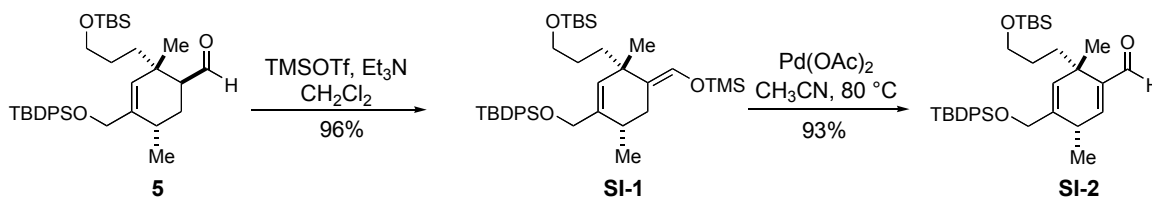

**Enal SI-2.** By following the literature procedure,<sup>1</sup> aldehyde **5** (4.90 g, 8.46 mmol) was converted to enol silane (5.28 g, 96% yield) as 3:1 mixture of alkene isomers. To a solution of enol silane **SI-1** (5.21 g, 8.00 mmol) in acetonitrile (150 mL) was added Pd(OAc)<sub>2</sub> (2.60 g, 11.6 mmol). The flask was fitted with a reflux condenser and was heated to ca. 80 °C for 1 h; additional Pd(OAc)<sub>2</sub> (1 g) was added. The reaction was judged complete after 20 h (TLC analysis). The reaction mixture was cooled to 23 °C and then was loaded directly onto a flash chromatography column (SiO<sub>2</sub>, 750 g). Elution of the column with 10% EtOAc-hexane gave 4.32 g of **SI-2** (93%) as a clear light yellow oil:  $R_f$  0.50 (20% EtOAc-hexane);  $[\alpha]_D^{27}$  -0.3 ( $c$  1.7,  $\text{CHCl}_3$ );  $^1\text{H}$  NMR (500 MHz,  $\text{CDCl}_3$ )  $\delta$  9.45 (s, 1H), 7.65 (m, 4H), 7.40 (m, 6H), 6.65 (d,  $J=3.7$  Hz, 1H), 5.22 (s, 1H), 4.26 (AB,  $J=12.2$  Hz, 1H), 4.13 (AB,  $J=13.2$  Hz, 1H), 3.50 (m, 2H), 3.19 (m, 1H), 2.05 (m, 1H), 1.56 (app s, 1H), 1.28 (s, 3H), 1.27-1.20 (2H), 1.16 (d,  $J=7.3$  Hz, 3H), 1.06 (s, 9H), 0.85 (s, 9H), -0.004 (s, 3H), -0.008 (s, 3H);  $^{13}\text{C}$  NMR (125 MHz,  $\text{CDCl}_3$ )  $\delta$  194.2, 156.2, 142.8, 135.5, 134.7, 133.6, 133.5, 130.83, 130.80, 129.7, 129.6, 127.7, 127.6, 65.4, 63.4, 38.2, 34.6, 32.4, 29.5, 27.5, 26.8,

25.9, 19.3, 19.2, 18.2, -5.3; FT-IR (neat) 2956, 2930, 2857, 1694, 1471, 1462, 1428, 1255, 1111, 836, 702  $\text{cm}^{-1}$ ; HRMS (ESI) calcd. for  $\text{C}_{35}\text{H}_{52}\text{O}_3\text{Si}_2\text{Na}$   $[\text{M}+\text{Na}]^+$  599.3353, found 599.3350  $\text{m/z}$ .

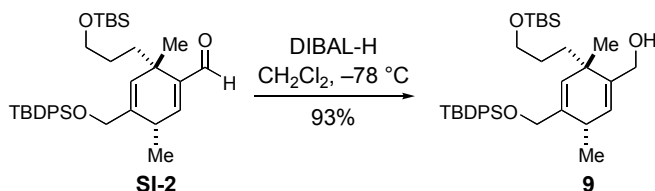

**Allylic alcohol 9.** To a  $-78\text{ }^\circ\text{C}$  solution of enal **SI-2** (13.3 g, 23.1 mmol) in  $\text{CH}_2\text{Cl}_2$  (100 mL) was added DIBAL-H (31 mL, 1.5M solution in toluene) over 15 min. The reaction was judged complete after 30 min (TLC analysis) and MeOH (10 mL) was added slowly. The reaction mixture was allowed to warm to  $23\text{ }^\circ\text{C}$ , was treated with saturated aq. Rochelle's salt, and was stirred until both phases were clear and colorless (ca 2-3 h). The layers were separated and the aqueous layer was extracted with  $\text{CH}_2\text{Cl}_2$  (2 x 200 mL). The organic extracts were washed with brine, dried with  $\text{MgSO}_4$ , filtered, and concentrated. Purification of the crude product by chromatography on  $\text{SiO}_2$  (12 to 15% EtOAc-hexane) to afford allylic alcohol **9** (12.5 g, 93%) as a light yellow oil:  $R_f$  0.38 (20% EtOAc-hexane);  $[\alpha]_D^{27} -6.4$  ( $c$  4.6,  $\text{CHCl}_3$ );  $^1\text{H NMR}$  (500 MHz,  $\text{CDCl}_3$ )  $\delta$  7.75 (m, 4H), 7.41 (m, 6H), 5.81 (app d,  $J=3.6\text{ Hz}$ , 1H), 5.28 (s, 1H), 4.28 (AB,  $J=12.9\text{ Hz}$ , 1H), 4.18 (AB,  $J=12.9\text{ Hz}$ , 1H), 4.16 (s, 2H), 3.52 (m, 1H), 3.56 (m, 1H), 2.94 (1H), 1.84 (1H), 1.66 (app dt,  $J=11.5, 3.2\text{ Hz}$ , 1H), 1.40-1.22 (3H), 1.19 (s, 3H), 1.10 (s, 9H), 1.09 (d,  $J=7.1\text{ Hz}$ , 3H), 0.92 (s, 9H), 0.071 (s, 6H);  $^{13}\text{C NMR}$  (125 MHz,  $\text{CDCl}_3$ )  $\delta$  139.0, 137.0, 135.5, 135.4, 133.9, 133.7, 129.6, 129.5, 128.6, 127.6, 127.5, 65.6, 63.3, 62.5, 38.9, 36.0, 31.6, 31.3, 29.0, 28.9, 36.0, 31.6, 31.3, 29.0, 28.9, 26.8, 25.9, 22.6, 20.4, 19.3, 18.3, 14.1, -5.3; FT-IR (neat) 3412, 2956, 2930, 2930, 2857, 1649, 1462, 1471, 1428, 1255, 1111, 834, 774, 700, 612  $\text{cm}^{-1}$ ; HRMS (ESI) calcd. for  $\text{C}_{35}\text{H}_{54}\text{O}_3\text{Si}_2\text{Na}$   $[\text{M}+\text{Na}]^+$  601.3509, found 601.3503  $\text{m/z}$ .

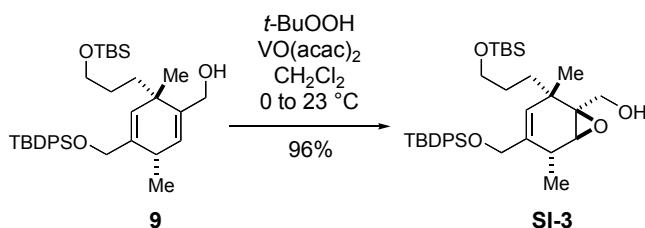

**Epoxy alcohol SI-3.** To a  $0\text{ }^\circ\text{C}$  solution of allylic alcohol **9** (12.5 g, 21.6 mmol) in  $\text{CH}_2\text{Cl}_2$  (150 mL) was added  $\text{VO}(\text{acac})_2$  (210 mg, 0.79 mmol) in one portion. To this dark green solution was added  $t\text{-BuOOH}$  (3.60 mL, 6.0M in decane, 21.6 mmol). The solution turned dark purple, then

SI-3

the reaction mixture was allowed to warm to 23 °C and was stirred for 1 h at which point the solution was a clear orange/red color. The reaction mixture was diluted with EtOAc (500 mL) and 1M aq. HCl and the layers were separated. The aqueous layer was extracted with EtOAc (1 x 300 mL), the combined organic extracts were washed with saturated aq. NaHCO<sub>3</sub> (1 x), brine (1 x), saturated aq. Na<sub>2</sub>S<sub>2</sub>O<sub>3</sub>, dried with MgSO<sub>4</sub>, filtered, and concentrated. The crude product was partially purified by chromatography on SiO<sub>2</sub> (15 to 30% EtOAc-hexane). Some *t*-BuOOH contaminated the desired product so the residue was taken up in ca 150 mL 30% EtOAc-hexane, treated with 10% aq. tartaric acid (50 mL) and FeSO<sub>4</sub> (ca 2 g) and was stirred for 5 h. Separation of the layers, extraction of the aqueous layer with EtOAc (1 x 200 mL), drying of the combined organic extracts with MgSO<sub>4</sub>, filtration, and concentration gave epoxy alcohol **SI-3** (12.4 g, 96%) as a clear viscous oil: R<sub>f</sub> 0.49 (35% EtOAc-hexane); [α]<sub>D</sub><sup>27</sup> -18.7 (*c* 4.7, CHCl<sub>3</sub>); <sup>1</sup>H NMR (500 MHz, CDCl<sub>3</sub>) δ 7.70 (app t, 4H), 7.40 (m, 6H), 5.11 (s, 1H), 4.13 (m, 1H), 3.93 (dd, *J*=12.2, 2.9 Hz, 1H), 3.81 (dd, *J*=12.2, 9.7 Hz, 1H), 3.62 (m, 1H), 3.55 (m, 1H), 3.31 (s, 1H), 2.71 (q, *J*=14.6, 7.3 Hz, 1H), 2.00 (dd, *J*=10.7, 3.2 Hz, 1H), 1.56 (m, 1H), 1.46 (m, 2H), 1.35 (m, 1H), 1.17 (s, 3H), 1.10 (d, *J*=7.3 Hz, 3H), 1.07 (s, 9H), 0.91 (s, 9H), 0.061 (s, 6H); <sup>13</sup>C NMR (125 MHz, CDCl<sub>3</sub>) δ 135.5, 135.4, 135.0, 133.6, 133.5, 129.6, 129.56, 127.6, 127.57, 126.6, 126.5, 65.8, 63.5, 63.1, 60.8, 60.7, 59.0, 37.8, 34.7, 30.2, 28.6, 25.9, 24.4, 19.2, 18.2, 16.7, -5.4; FT-IR (neat) 3468, 2955, 2930, 2857, 1471, 1462, 1428, 1255, 1111, 835, 702 cm<sup>-1</sup>; HRMS (ESI) calcd. for C<sub>35</sub>H<sub>54</sub>O<sub>4</sub>Si<sub>2</sub>Na [M+Na]<sup>+</sup> 617.3458, found 617.3461 m/z.

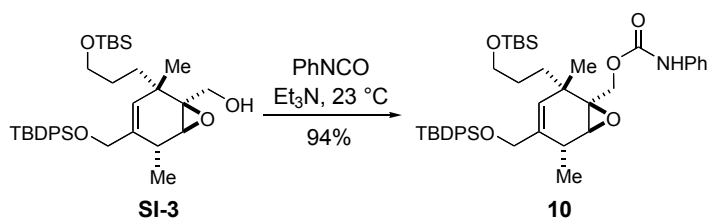

**Urethane 10.** To a solution of epoxy alcohol **SI-3** (3.56 g, 5.98 mmol) in CH<sub>2</sub>Cl<sub>2</sub> (30 mL) was added Et<sub>3</sub>N (1.10 mL, 7.78 mmol) and phenyl isocyanate (0.72 mL, 6.58 mmol). The reaction was judged complete after 1 h (TLC analysis), then was quenched with EtOAc (300 mL) and 1M aq. HCl. The layers were separated and the organic layer was washed with saturated aq. NaHCO<sub>3</sub> (1 x 100 mL), brine (1 x 100 mL), dried over MgSO<sub>4</sub>, filtered, and concentrated. The crude product was purified by chromatography on SiO<sub>2</sub> (15 to 20% EtOAc-hexane) giving urethane **10** (4.02 g, 94%) as a clear oil: R<sub>f</sub> 0.40 (20% EtOAc-hexane); [α]<sub>D</sub><sup>27</sup> -14.9 (*c* 3.7, CHCl<sub>3</sub>); <sup>1</sup>H NMR (500

MHz, CDCl<sub>3</sub>) 7.64 (dt, *J*=7.8, 1.7 Hz, 4H), 7.33 (m, 8H), 7.20 (t, *J*=8.6 Hz, 2H), 7.97 (t, *J*=8.4 Hz, 1H), 5.06 (s, 1H), 4.50 (AB, *J*=12.2 Hz, 1H), 4.36 (AB, *J*=12.2 Hz, 1H), 4.06 (app s, 2H), 3.60 (m, 1H), 3.54 (m, 1H), 3.17 (s, 1H), 2.63 (m, 1H), 1.66 (m, 1H), 1.50-1.36 (3H), 1.22 (1H), 1.20 (s, 3H), 1.02 (s, 12H), 0.87(s, 9H), 0.022 (s, 6H); <sup>13</sup>C NMR (125 MHz, CDCl<sub>3</sub>) 153.0, 137.8, 135.4, 135.3, 134.6, 133.5, 133.3, 129.5, 128.8, 127.5, 127.4, 126.5, 126.4, 123.2, 118.6, 65.7, 63.2, 61.8, 61.7, 61.6, 38.2, 35.3, 31.4, 30.1, 28.6, 26.7, 25.8, 24.7, 22.5, 19.1, 18.2, 16.5, 14.0, -5.4; FT-IR (neat) 3323, 3050, 2956, 2930, 2857, 1740, 1601, 1541, 1255, 1218, 1111, 1055, 835, 702 cm<sup>-1</sup>; HRMS (ESI) calcd. for C<sub>42</sub>H<sub>59</sub>O<sub>5</sub>Si<sub>2</sub>NNa [M+Na]<sup>+</sup> 736.3830, found 736.3851 m/z.

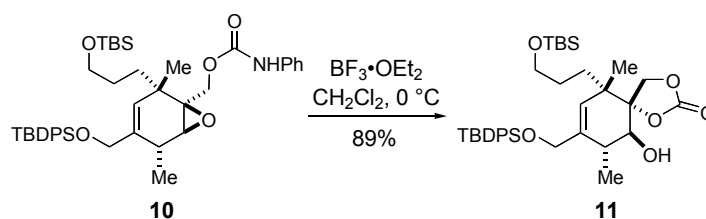

**Hydroxyl carbonate 11:** To a 0 °C solution of urethane **10** (5.68 g, 7.95 mmol) in CH<sub>2</sub>Cl<sub>2</sub> (80 mL) was added BF<sub>3</sub>·OEt<sub>2</sub> (1.05 mL, 8.30 mmol). The 0 °C mixture was stirred for 40 min, at which point the reaction was judged complete by TLC analysis. The mixture was treated with 500 mL EtOAc and 100 mL 1M aq. H<sub>2</sub>SO<sub>4</sub> and was stirred vigorously for 1.5 h. The layers were separated and the aqueous layer was extracted with EtOAc (1 x 200 mL), the combined organic extracts were washed with water (1 x), saturated aq. NaHCO<sub>3</sub> (1 x), brine (1 x), dried with MgSO<sub>4</sub>, filtered, and concentrated. The residue was purified by chromatography on SiO<sub>2</sub> (15-25% EtOAc-hexane) to afford hydroxy carbonate **11** (4.50 g, 89%) as a white foam: R<sub>f</sub> 0.23 (20% EtOAc-hexane); [α]<sub>D</sub><sup>27</sup> +18.5 (*c* 2.7, CHCl<sub>3</sub>); <sup>1</sup>H NMR (500 MHz, CDCl<sub>3</sub>) 7.63 (m, 4H), 7.45 (m, 2H), 7.39 (m, 4H), 5.30 (s, 1H), 4.35 (AB<sup>1</sup>, *J*=8.5 Hz, 1H), 4.15 (AB<sup>2</sup>, *J*=13.4 Hz, 1H), 4.09 (dd, *J*=8.8, 3.9 Hz, 1H), 4.06 (AB<sup>2</sup>, *J*=12.7 Hz, 1H), 3.96 (AB<sup>1</sup>, *J*=8.6 Hz, 1H), 3.58 (m, 1H), 3.52 (m, 1H), 2.44 (1H), 2.15 (m, 1H), 1.68-1.54 (2H), 1.15 (d, *J*=6.8 Hz, 3H), 1.06 (s, 9H), 1.04 (s, 3H), 0.88 (s, 9H), 0.03 (s, 6H); <sup>13</sup>C NMR (125 MHz, CDCl<sub>3</sub>) 155.2, 138.9, 135.4, 133.4, 133.3, 129.8, 127.7, 127.3, 71.7, 66.5, 64.8, 63.3, 41.5, 36.9, 35.2, 27.4, 26.7, 25.9, 19.1, 18.5, 18.2, 16.0, -5.3; FT-IR (neat) 3445, 2956, 2930, 2857, 1807, 1471, 1255, 1112, 1071, 836, 775, 702, 611 cm<sup>-1</sup>; HRMS (ESI) calcd. for C<sub>36</sub>H<sub>54</sub>O<sub>6</sub>Si<sub>2</sub>Na [M+Na]<sup>+</sup> 661.3357, found 661.3359 m/z.

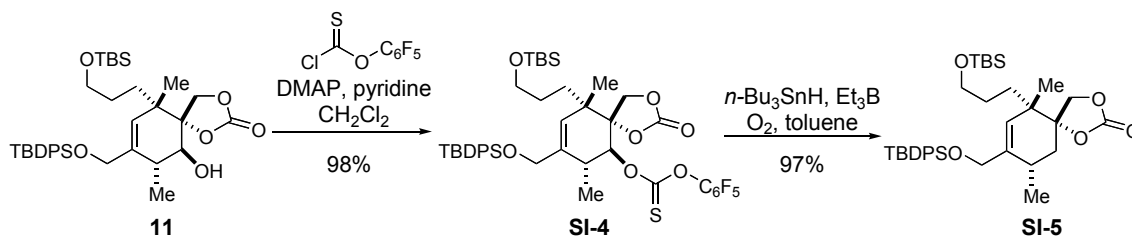

**Carbonate SI-5.** To a solution of hydroxy carbonate **11** (2.90 g, 4.54 mmol) in CH<sub>2</sub>Cl<sub>2</sub> (9 mL) was added DMAP (1.66 g, 13.6 mmol), pyridine (3.67 mL, 45.4 mmol), then pentafluorophenyl chlorothionoformate (1.45 mL, 9.08 mmol) was added slowly. The red/orange solution was submerged in a 20 °C water bath as an exotherm was observed. The reaction was complete after 1h, white precipitate (pyridine-HCl) formed during the course of the reaction. Water then 1M aq HCl were added and after stirring for 10 min, then the layers were separated, the aqueous layer was extracted with CH<sub>2</sub>Cl<sub>2</sub> (2 x). The combined organic extracts were washed with 1M aq. HCl, dried over MgSO<sub>4</sub>, filtered, and concentrated. The crude product was purified by chromatography on SiO<sub>2</sub> (15% EtOAc-hexane) to afford the thionocarbonate **SI-4** (3.84 g, 98%) as a white foam.

To a solution of thionocarbonate **SI-4** (8.59 g, 9.93 mmol) in toluene (200 mL) was added Et<sub>3</sub>B (1.5 mL, 1.0M in hexane, 1.5 mmol) and *n*-Bu<sub>3</sub>SnH (4.0 mL, 14.9 mmol). Atmospheric air (50 mL) was slowly sparged into the solution to initiate the radical deoxygenation. The reaction was judged complete (TLC analysis) after 10 min. The reaction mixture was directly subjected to chromatography on SiO<sub>2</sub> (5, 10, 15, 20% EtOAc-hexane) to separate the residual *n*-Bu<sub>3</sub>SnH. The crude material was subjected to a second round of purification by chromatography on SiO<sub>2</sub> (10 to 15% EtOAc-hexane) to afford the carbonate **SI-5** (6.70g, 97%) as an oil: R<sub>f</sub> 0.33 (20% EtOAc-hexane); [α]<sub>D</sub><sup>27</sup> +19.0 (*c* 5.8, CHCl<sub>3</sub>); <sup>1</sup>H NMR (500 MHz, CDCl<sub>3</sub>) δ 7.63 (m, 4H), 7.44 (m, 2H), 7.38 (m, 4H), 5.33 (s, 1H), 4.19 (AB, *J*=14.6 Hz, 1H), 4.17 (app s, 1H), 4.09 (AB, *J*=9.1 Hz, 1H), 3.56 (m, 2H), 2.37 (q, *J*=14.6, 7.6 Hz, 1H), 2.08 (dd, *J*=13.4, 9.3 Hz, 1H), 1.93 (dd, *J*=1.35, 7.1 Hz, 1H), 1.53 (m, 3H), 1.26 (2H), 1.30 (app s, 12H), 0.99 (s, 3H), 0.88 (s, 9H), 0.03 (s, 6H); <sup>13</sup>C NMR (125 MHz, CDCl<sub>3</sub>) δ 154.7, 139.5, 135.3, 133.4, 133.3, 129.7, 127.6, 127.5, 87.0, 71.4, 65.0, 63.3, 40.2, 37.5, 34.5, 28.9, 27.4, 26.7, 25.8, 19.1, 18.1, -5.4; FT-IR (neat) 2956, 2930, 2857, 1807, 1471, 1428, 1255, 1111, 1066, 835, 702 cm<sup>-1</sup>; HRMS (ESI) calcd. for C<sub>36</sub>H<sub>54</sub>O<sub>5</sub>Si<sub>2</sub>Na [M+Na]<sup>+</sup> 645.3408, found 645.3407 m/z.



concentrated, and was purified by chromatography on SiO<sub>2</sub> (10% EtOAc-hexane) to afford the known  $\alpha$ -hydroxy aldehyde *exo*-**8b** (116 mg, 85%) as an oil:  $[\alpha]_D^{27} -1.5$  (*c* 11.6, CHCl<sub>3</sub>).<sup>1</sup>

**References:**

- (1) Roush, W. R.; Barda, D. A.; Limberakis, C.; Kunz, R. K. *Tetrahedron* **2002**, *58*, 6433.



# Studies on the Synthesis of Quartromicins A<sub>3</sub> and D<sub>3</sub>: Synthesis of the Vertical and Horizontal Bis-Spirotetronate Fragments

Tony K. Trullinger<sup>a</sup>, Jun Qi<sup>a</sup> and William R. Roush\*<sup>b</sup>

<sup>a</sup> Department of Chemistry, University of Michigan, Ann Arbor, MI 48109 and

<sup>b</sup> Department of Medicinal Chemistry, Scripps-Florida, Jupiter, FL 33458

e-mail: [roush@scripps.edu](mailto:roush@scripps.edu)

## Supporting Information—Part 2

Copies of <sup>1</sup>H NMR spectra for new compounds





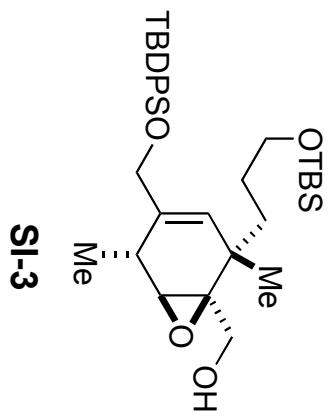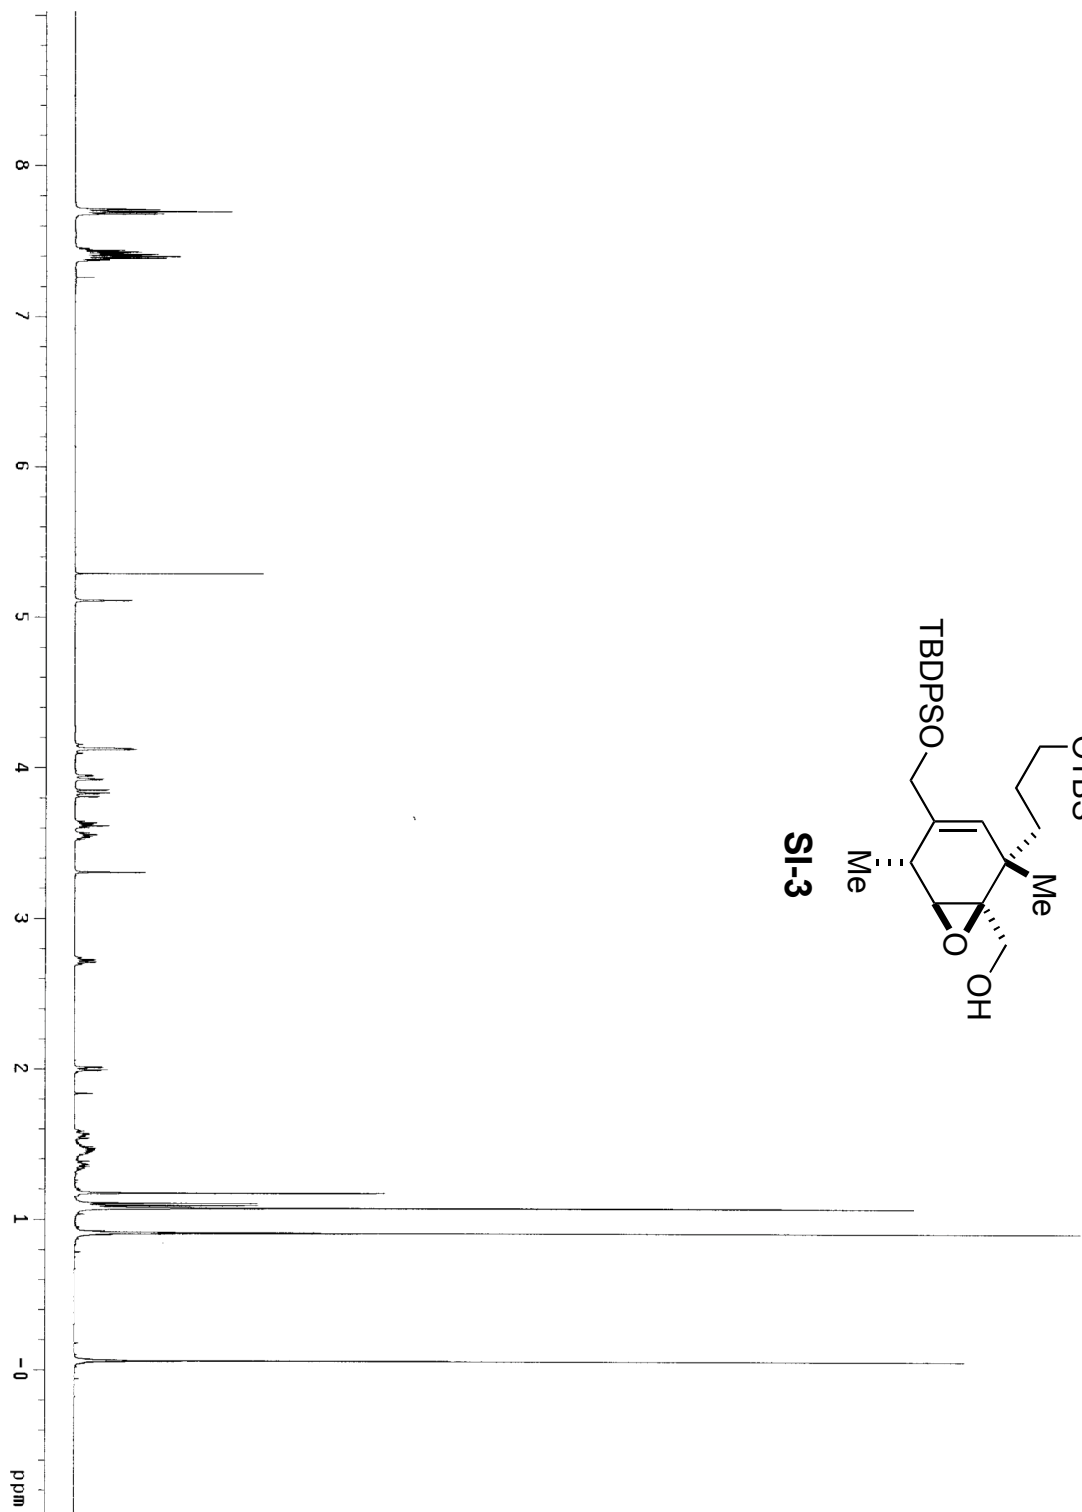

SI-12

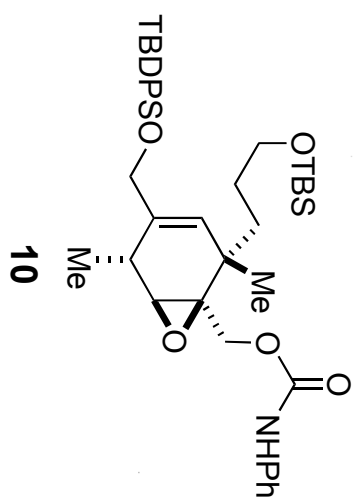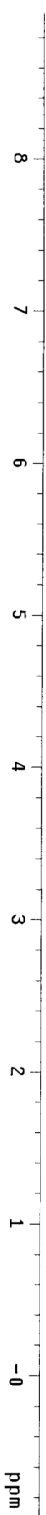

SI-13

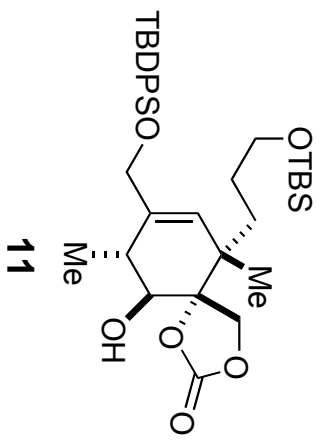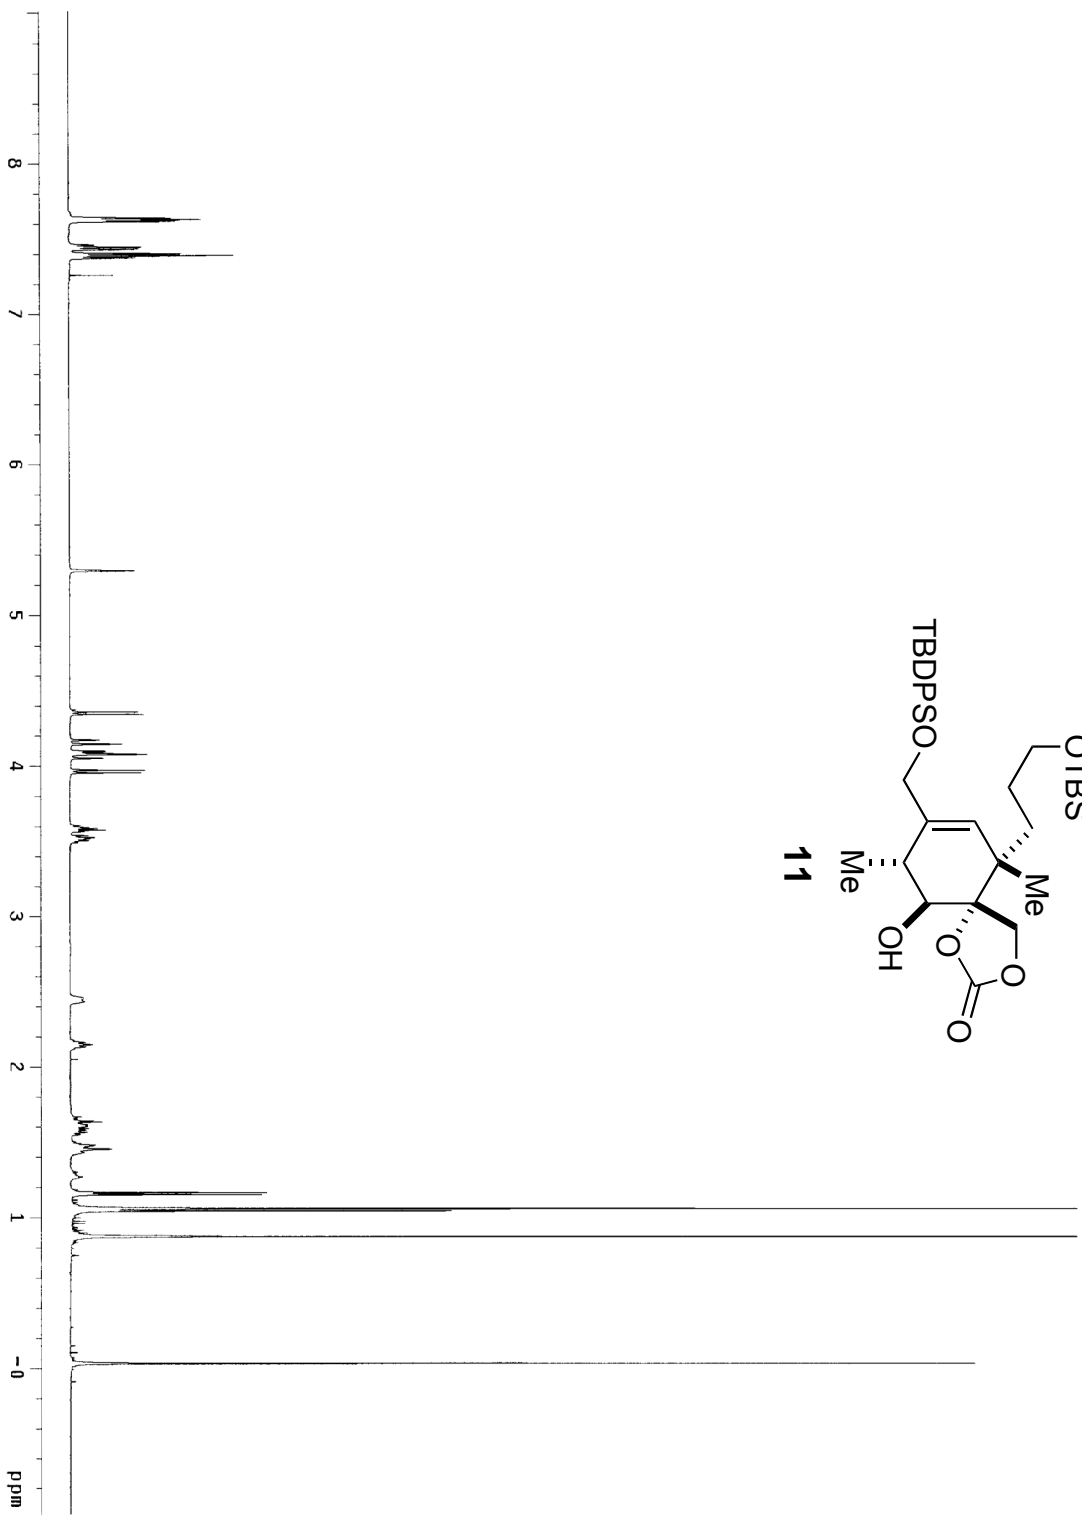

SI-14

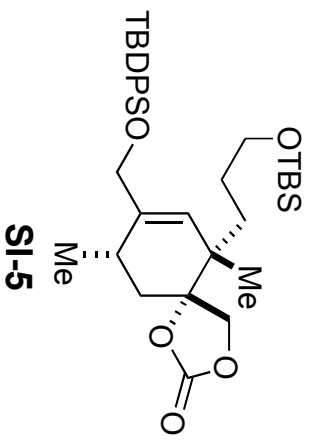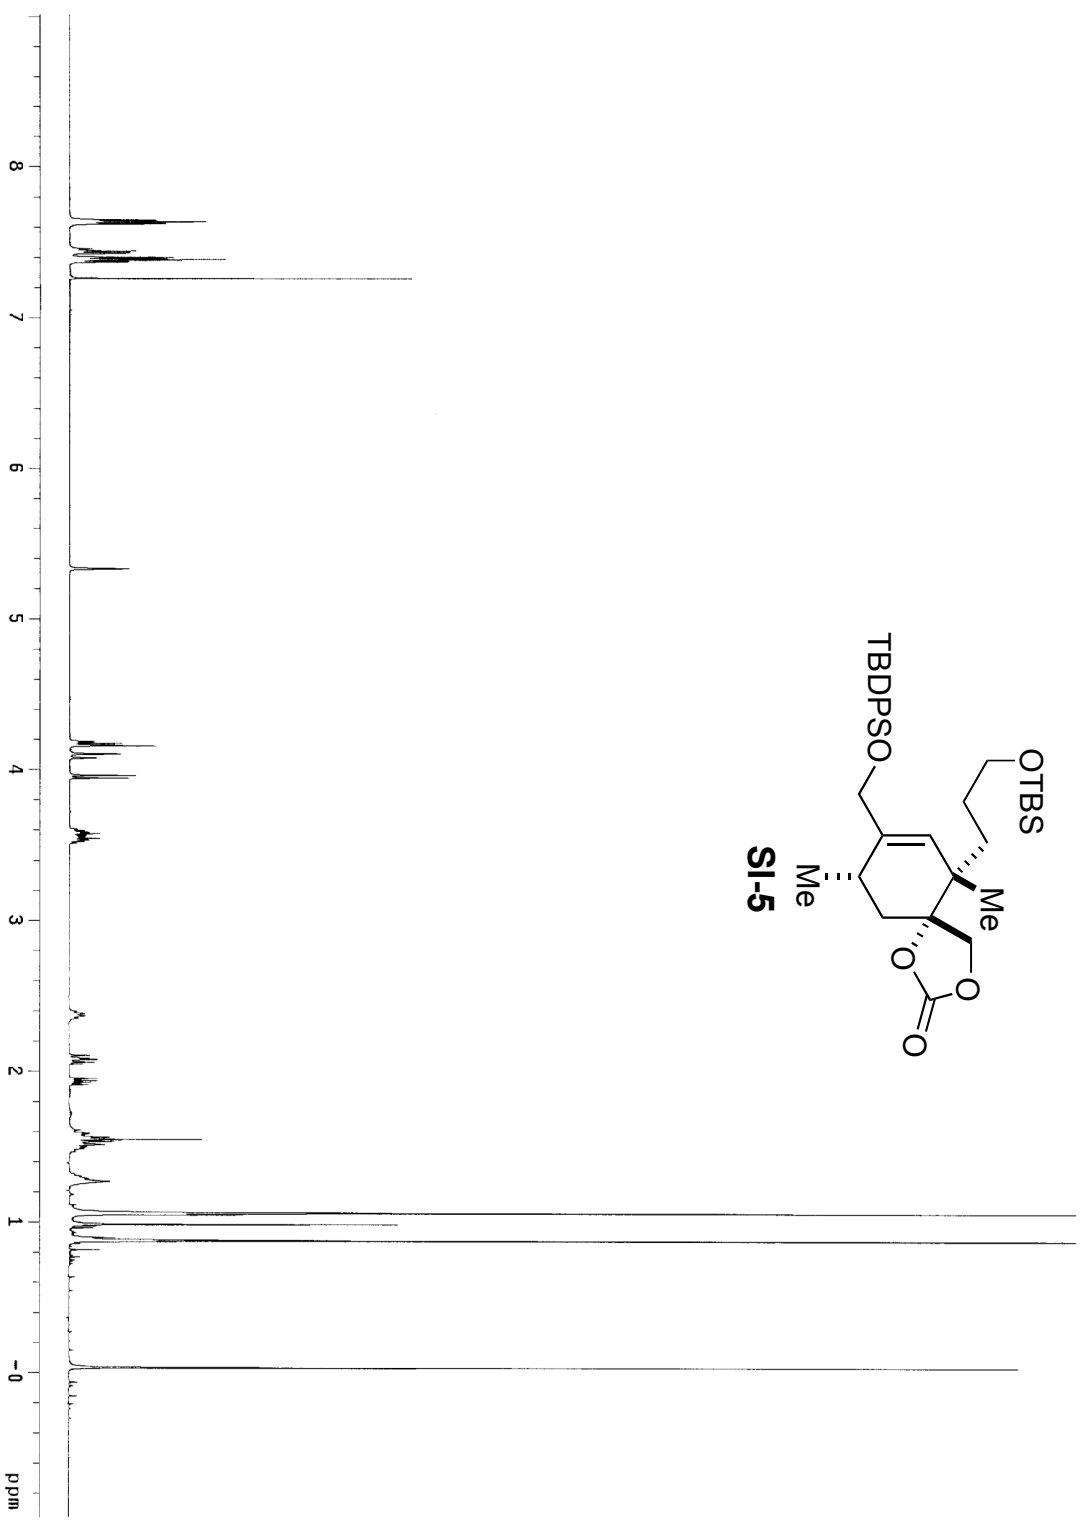

SI-15

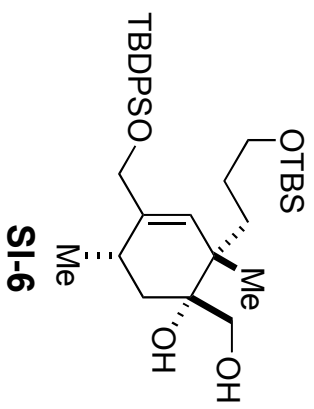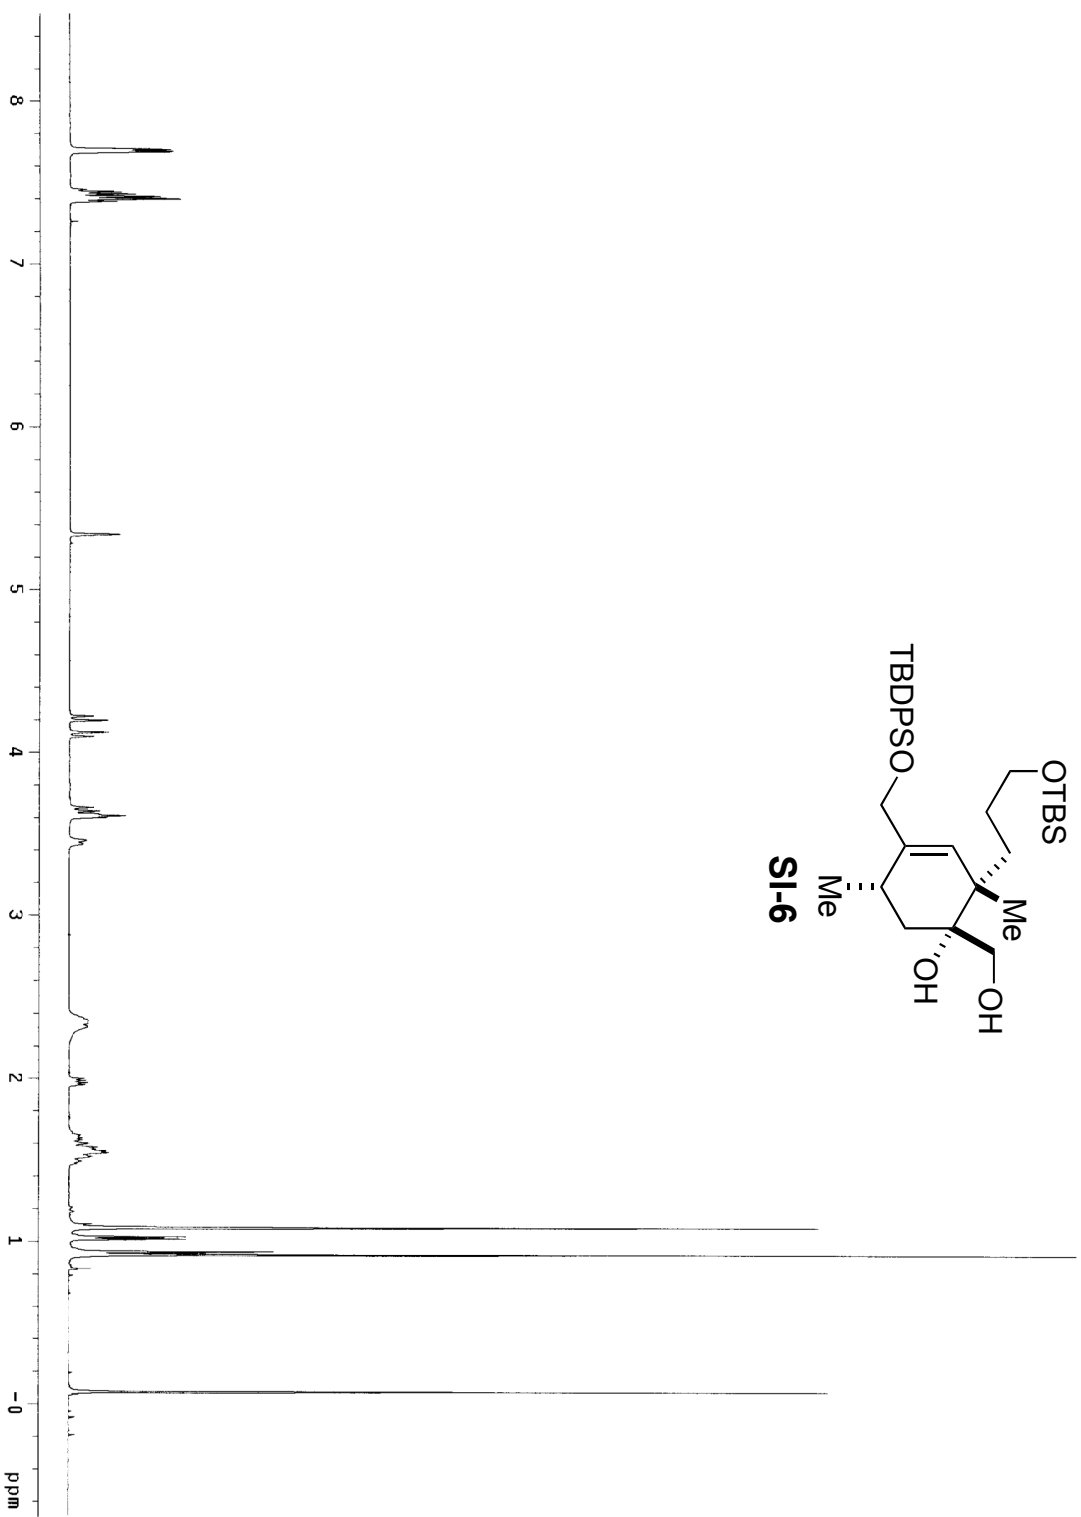

SI-16



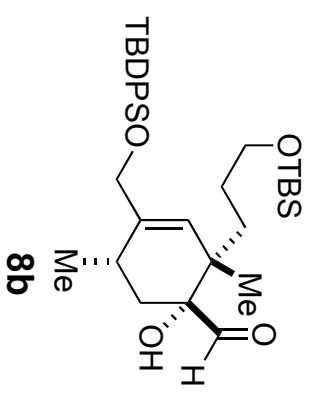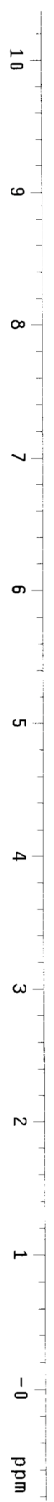

SI-17

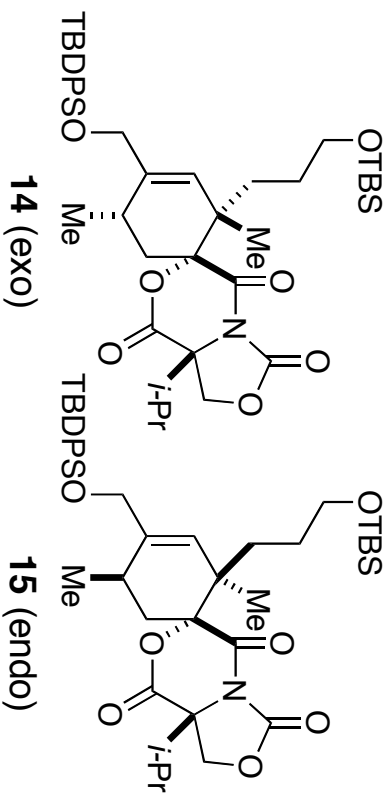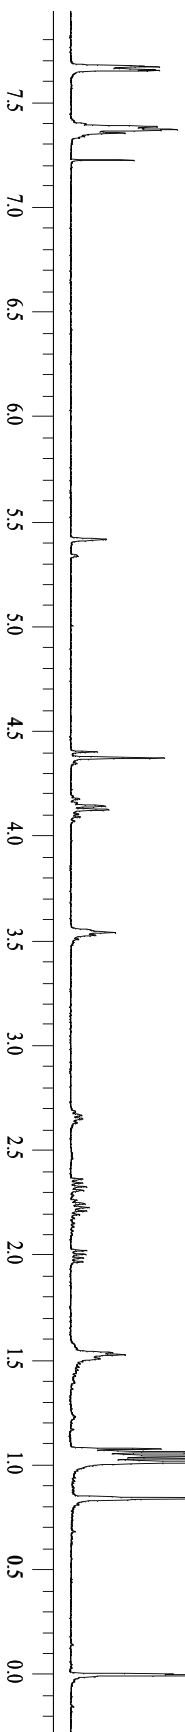

SI-18

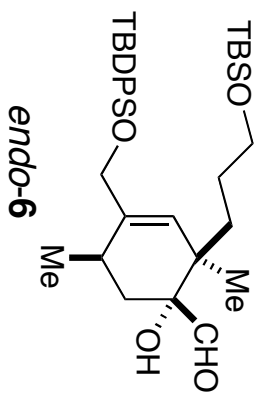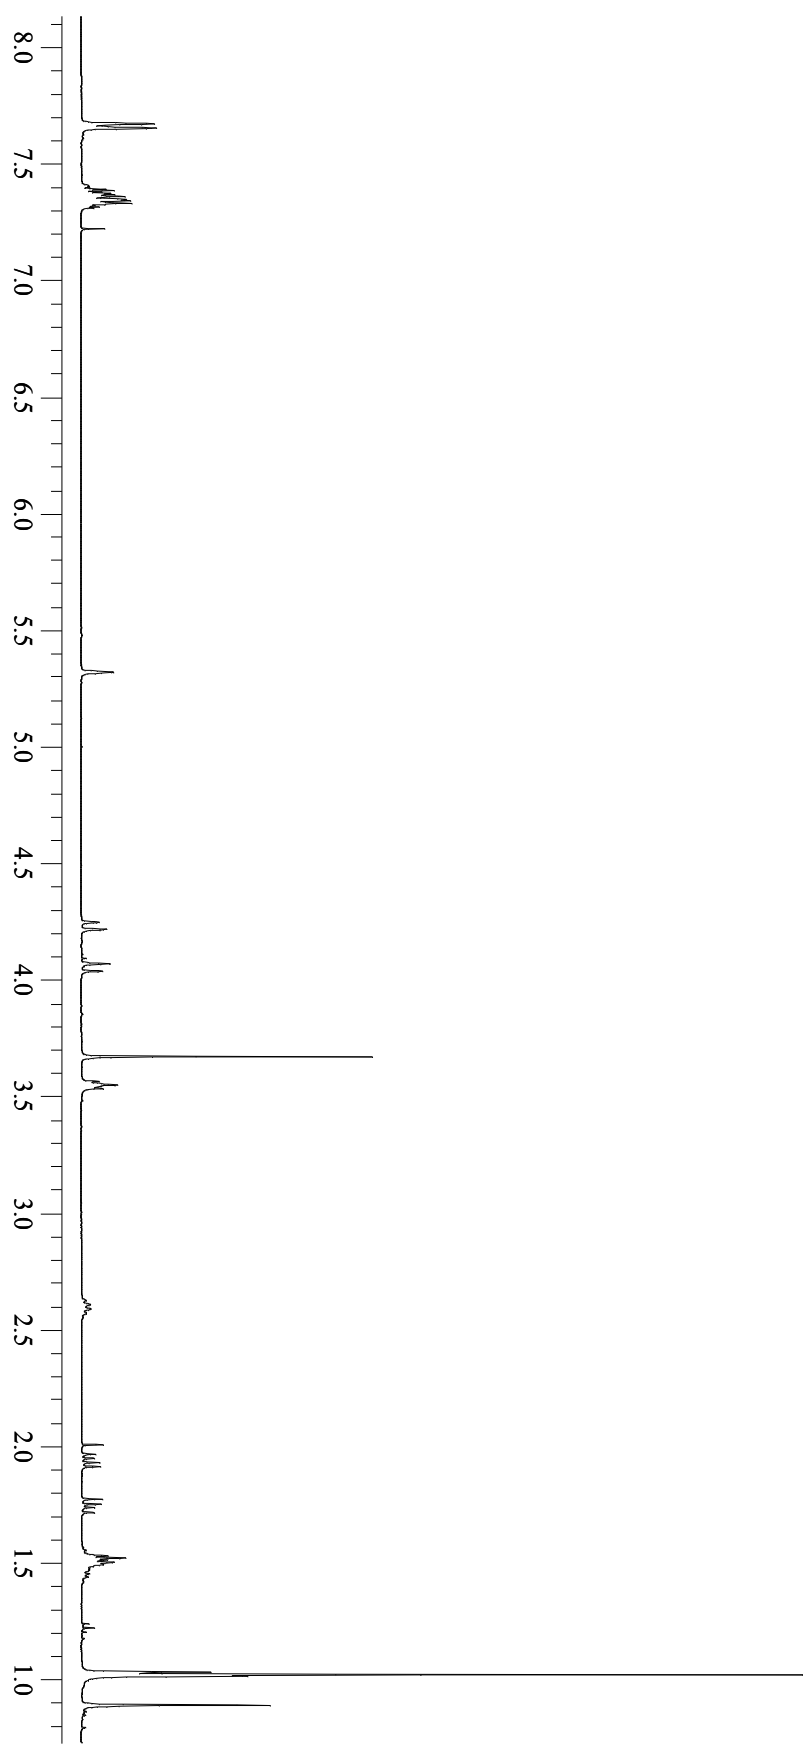

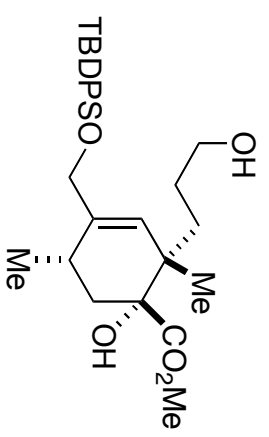

**exo-16**

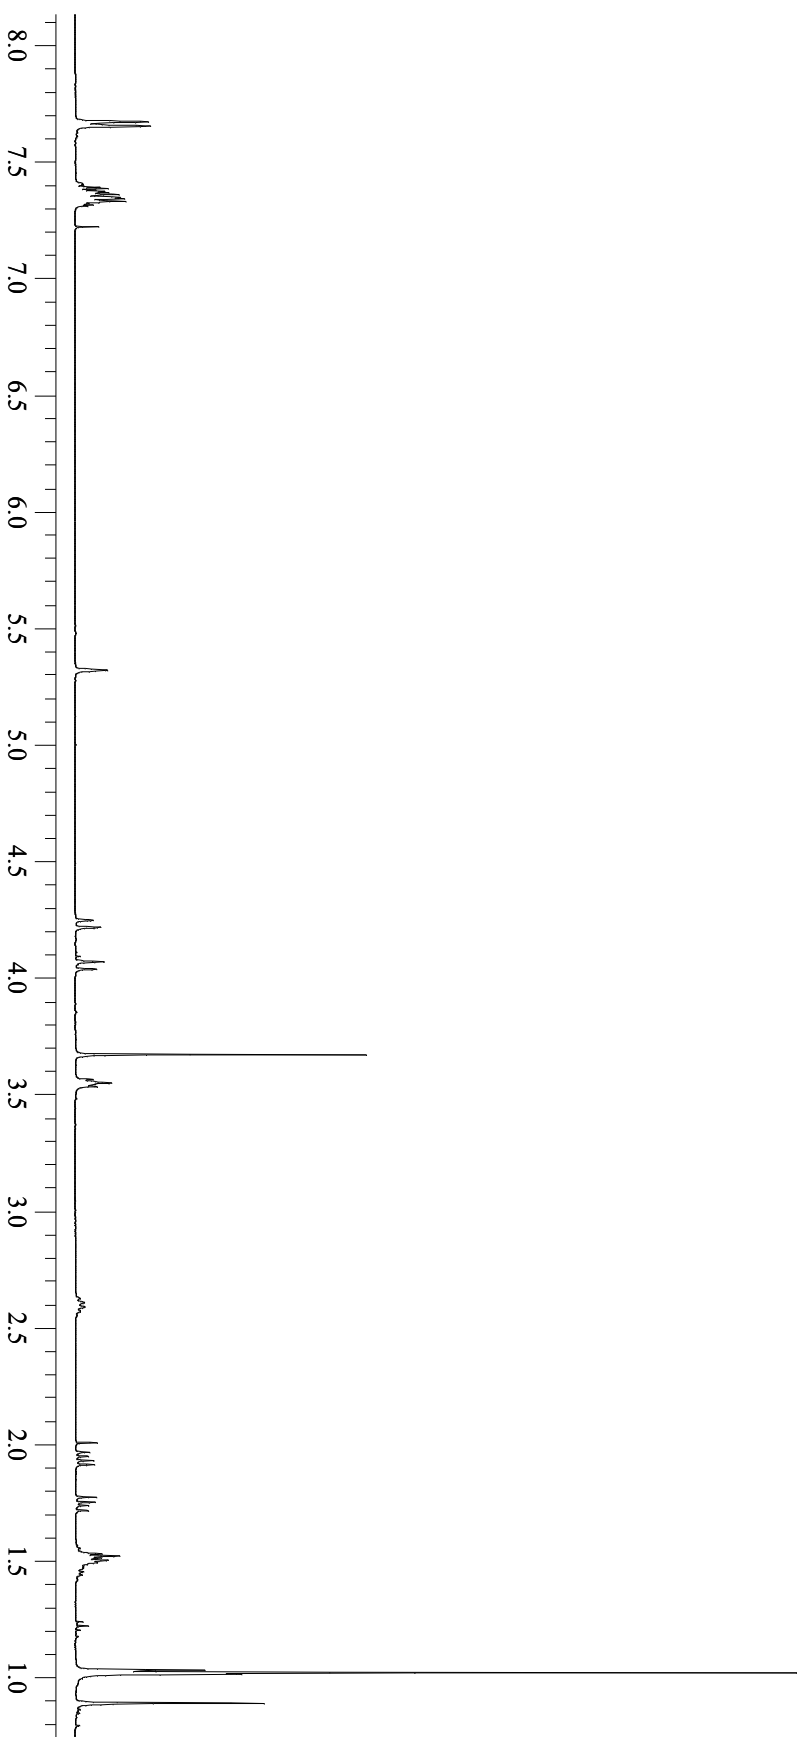

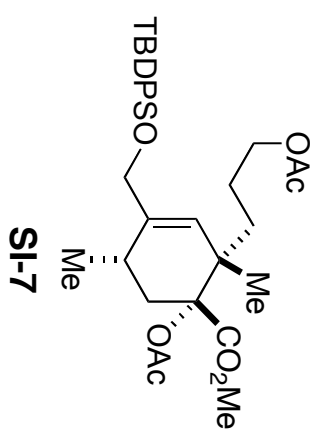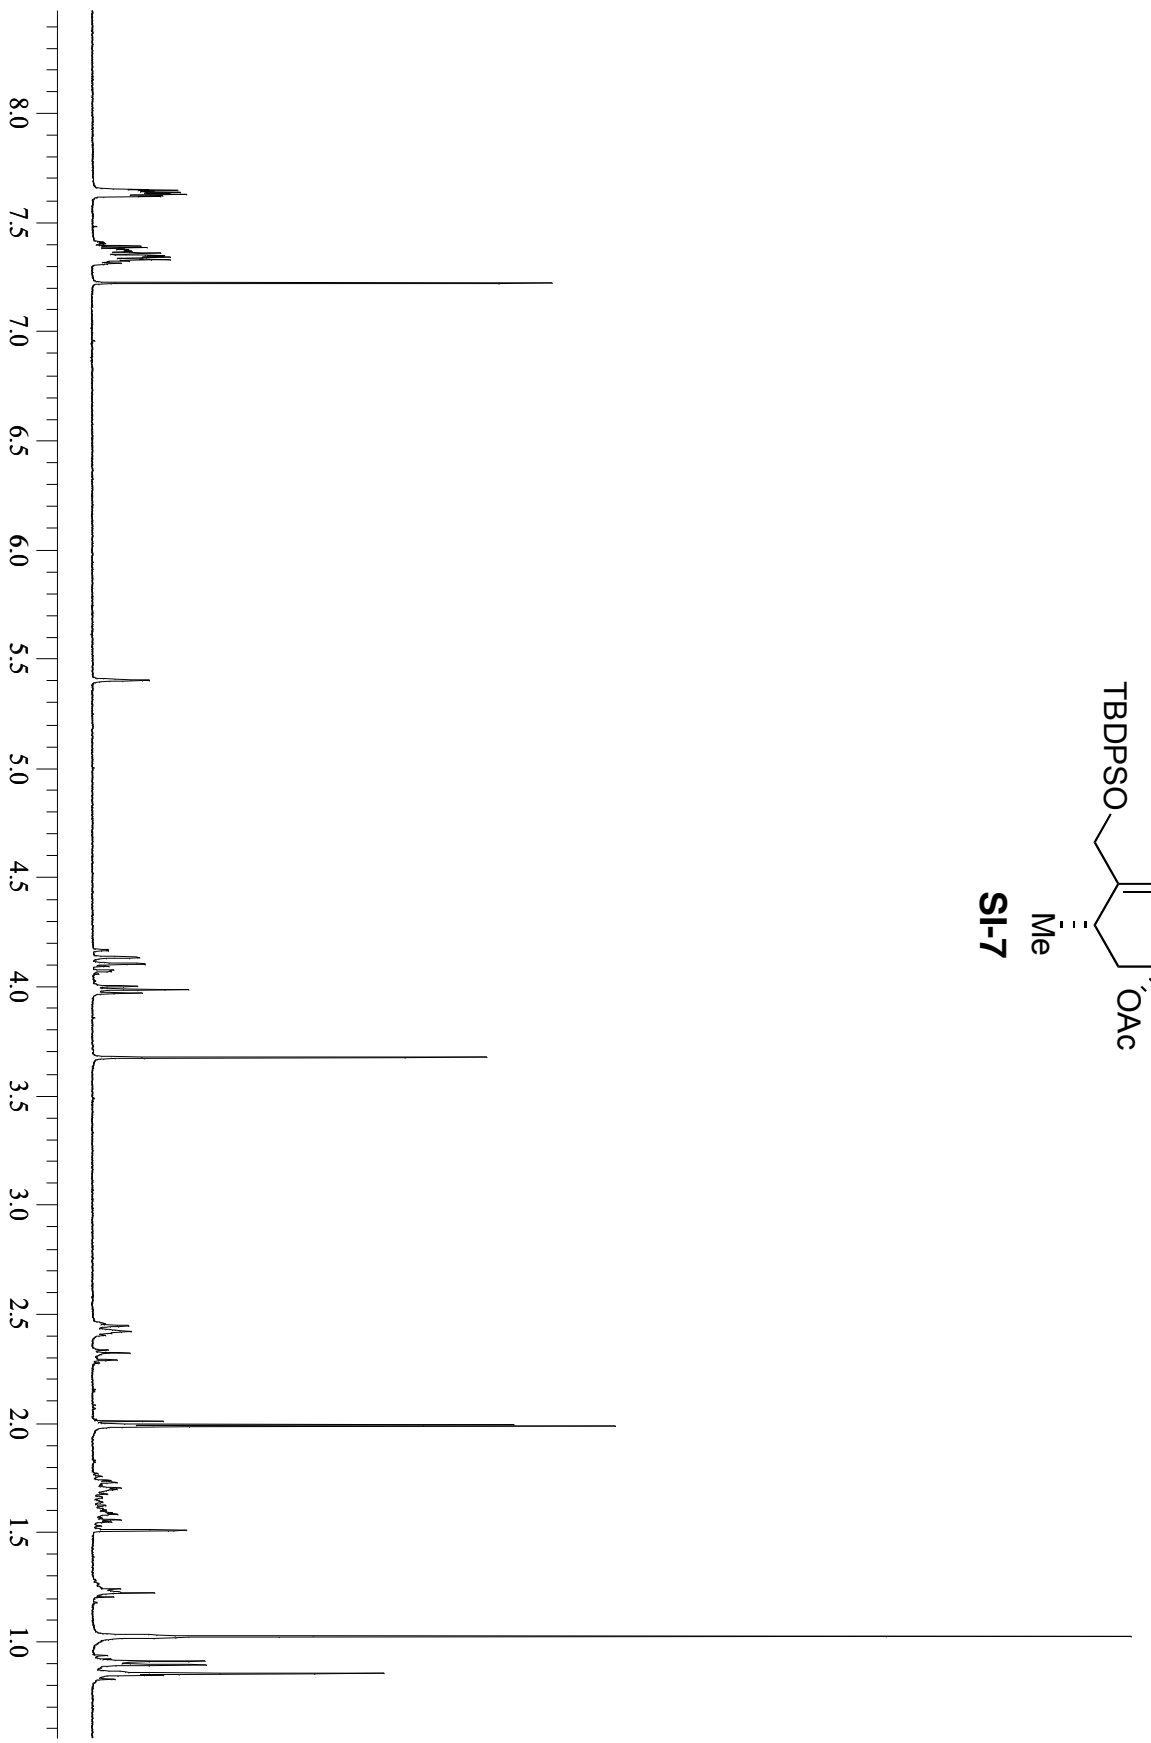

SI-21

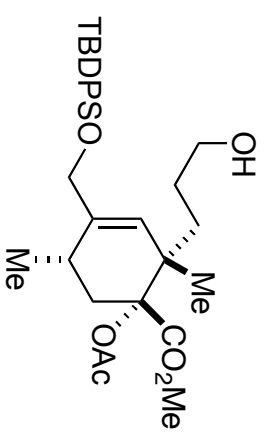

**exo-17**

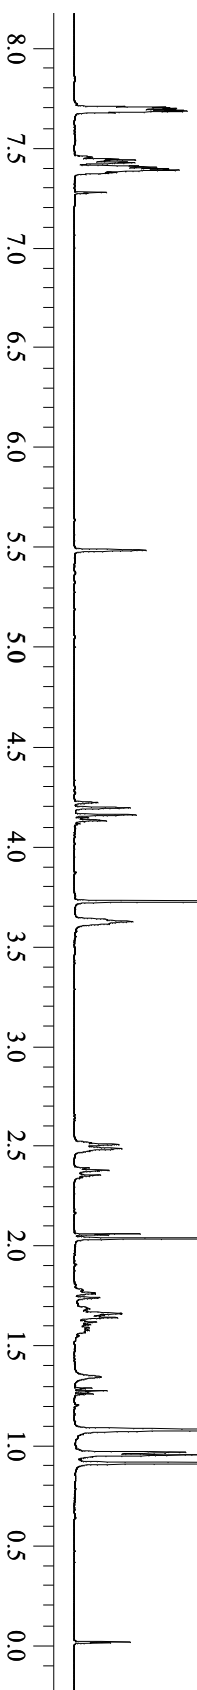

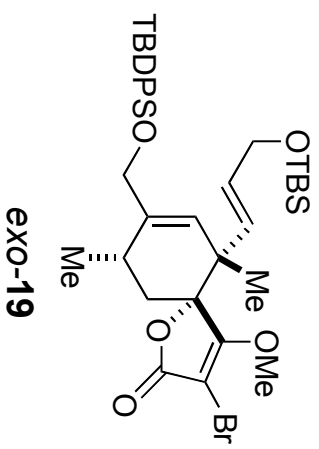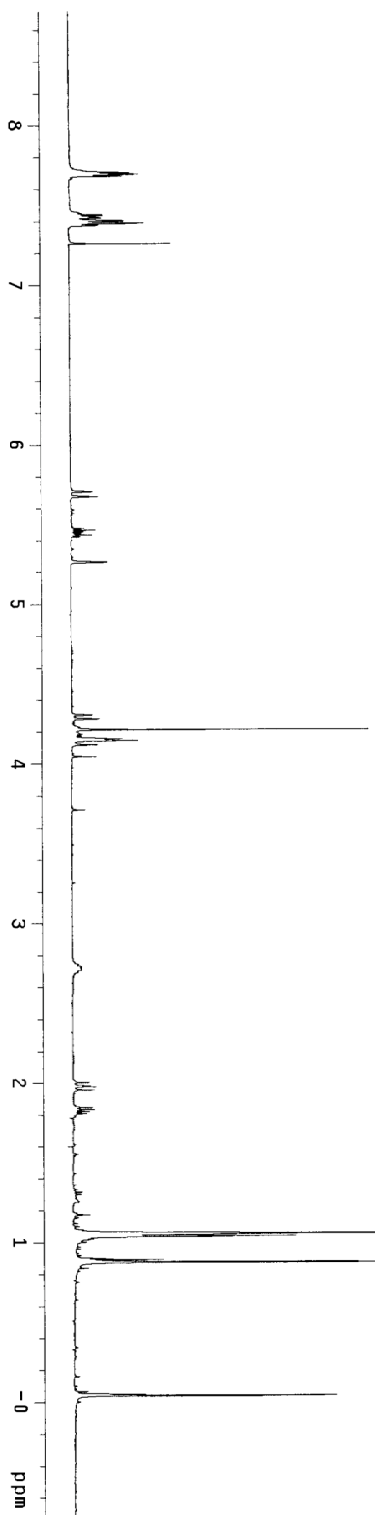

SI-23





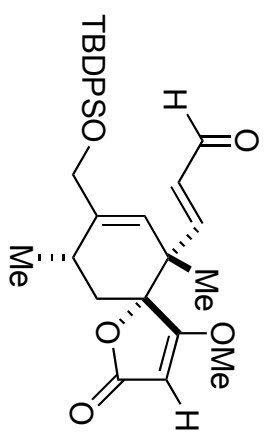

**exo-21**

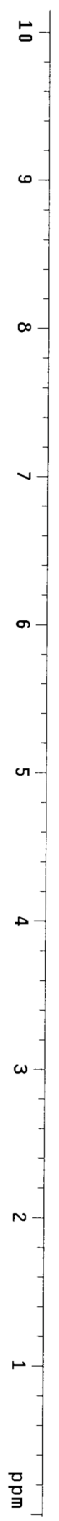

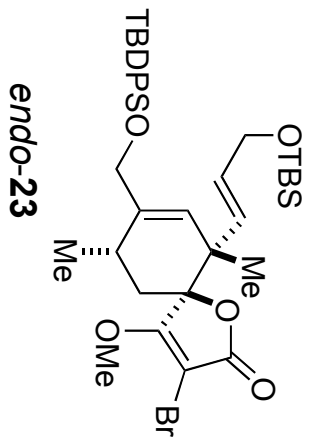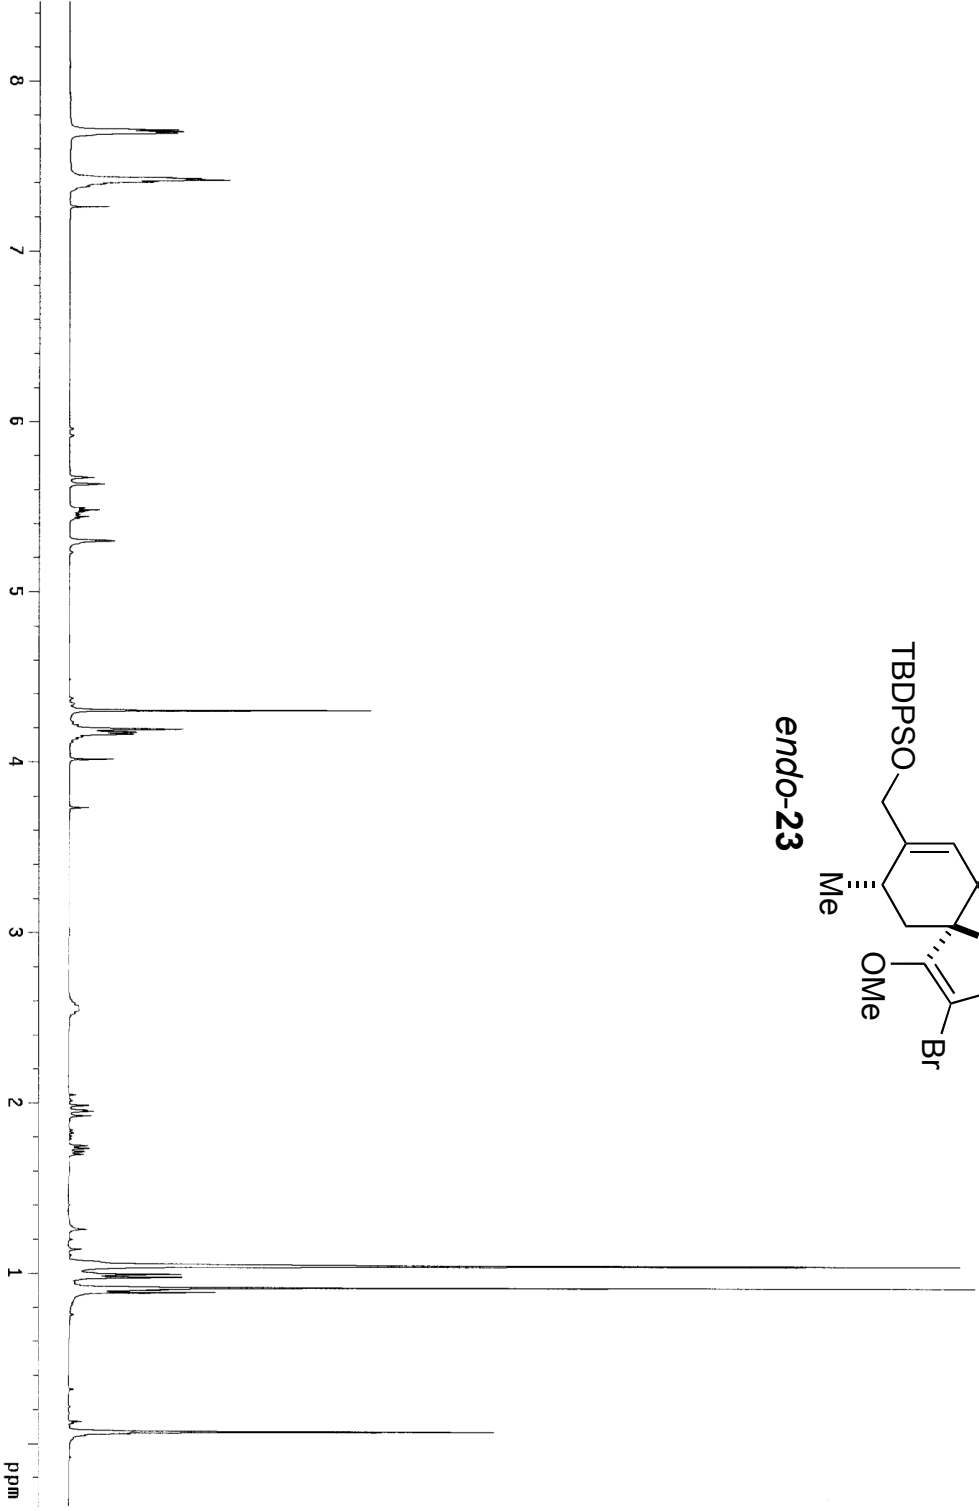

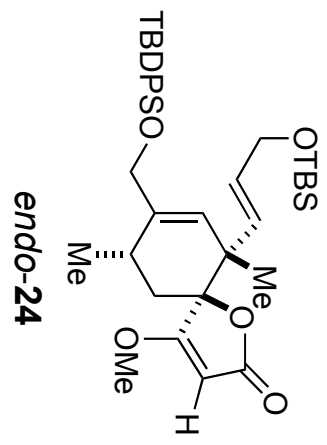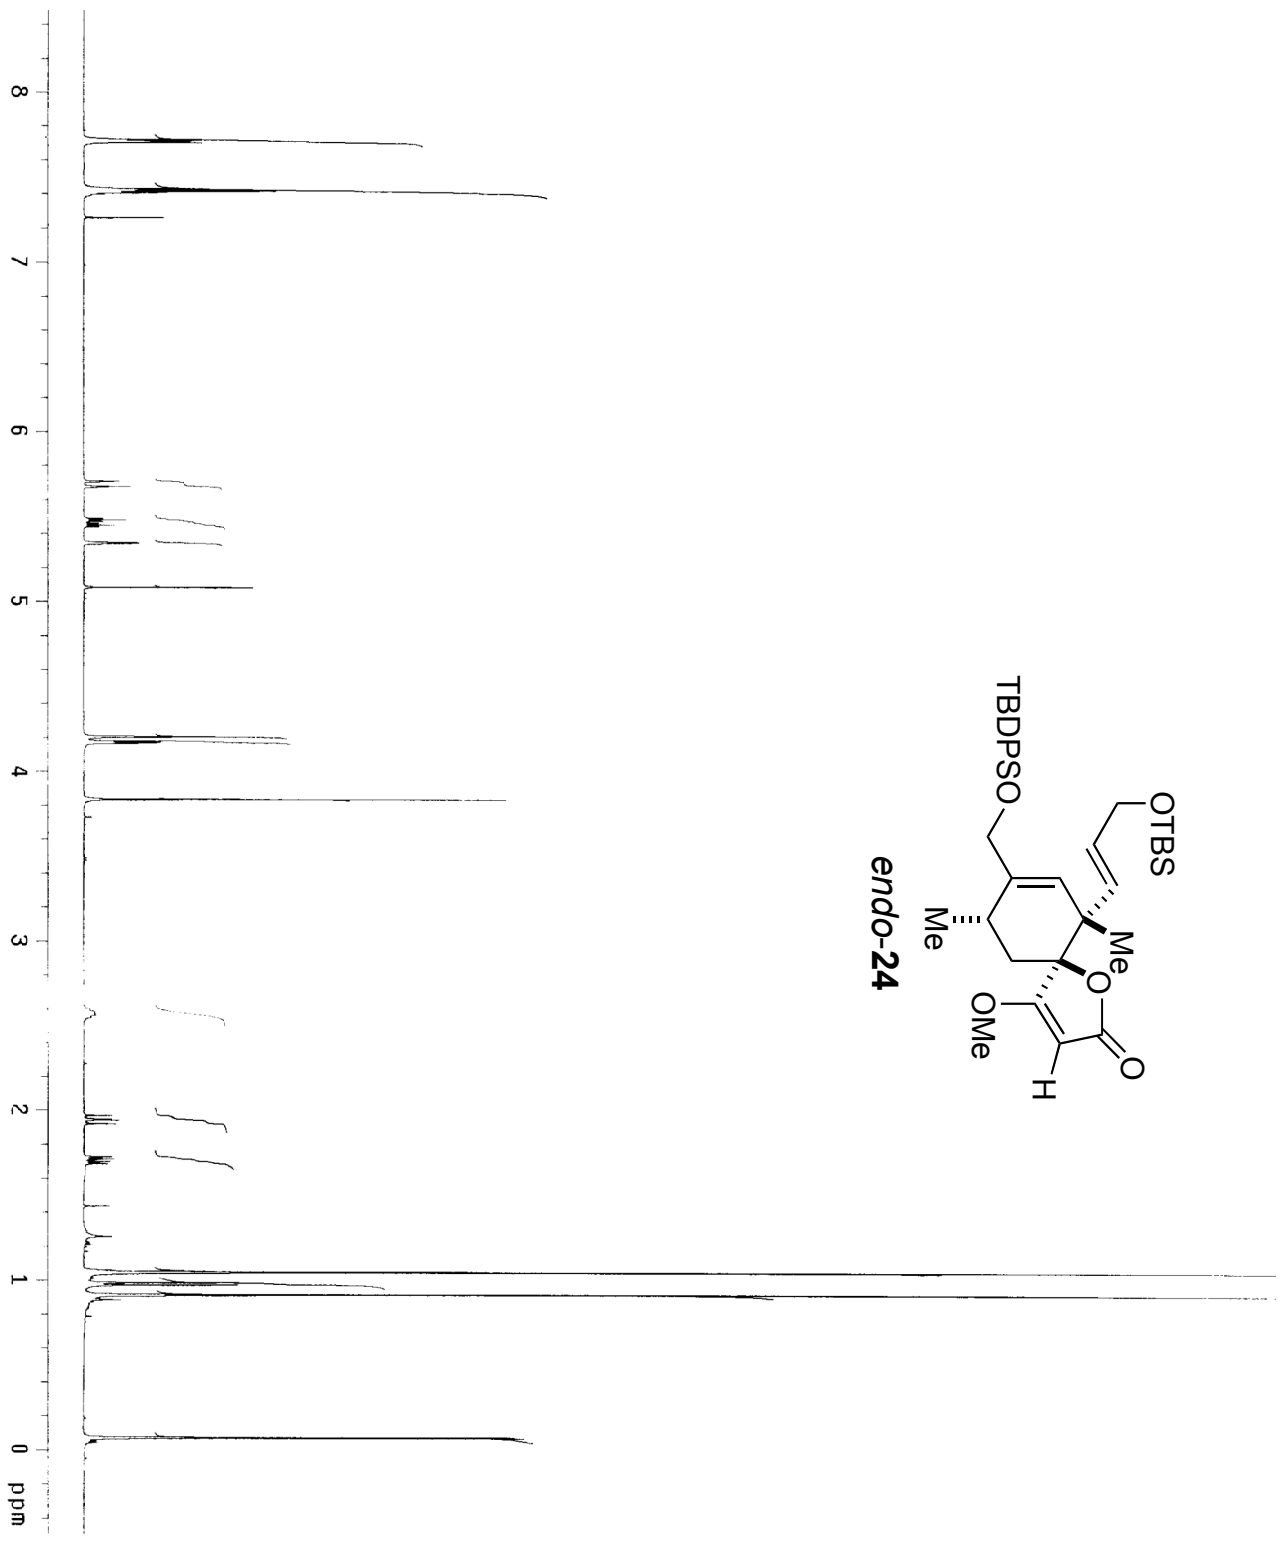

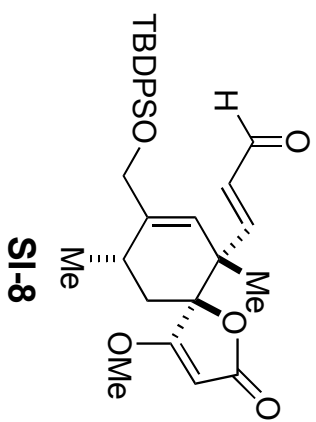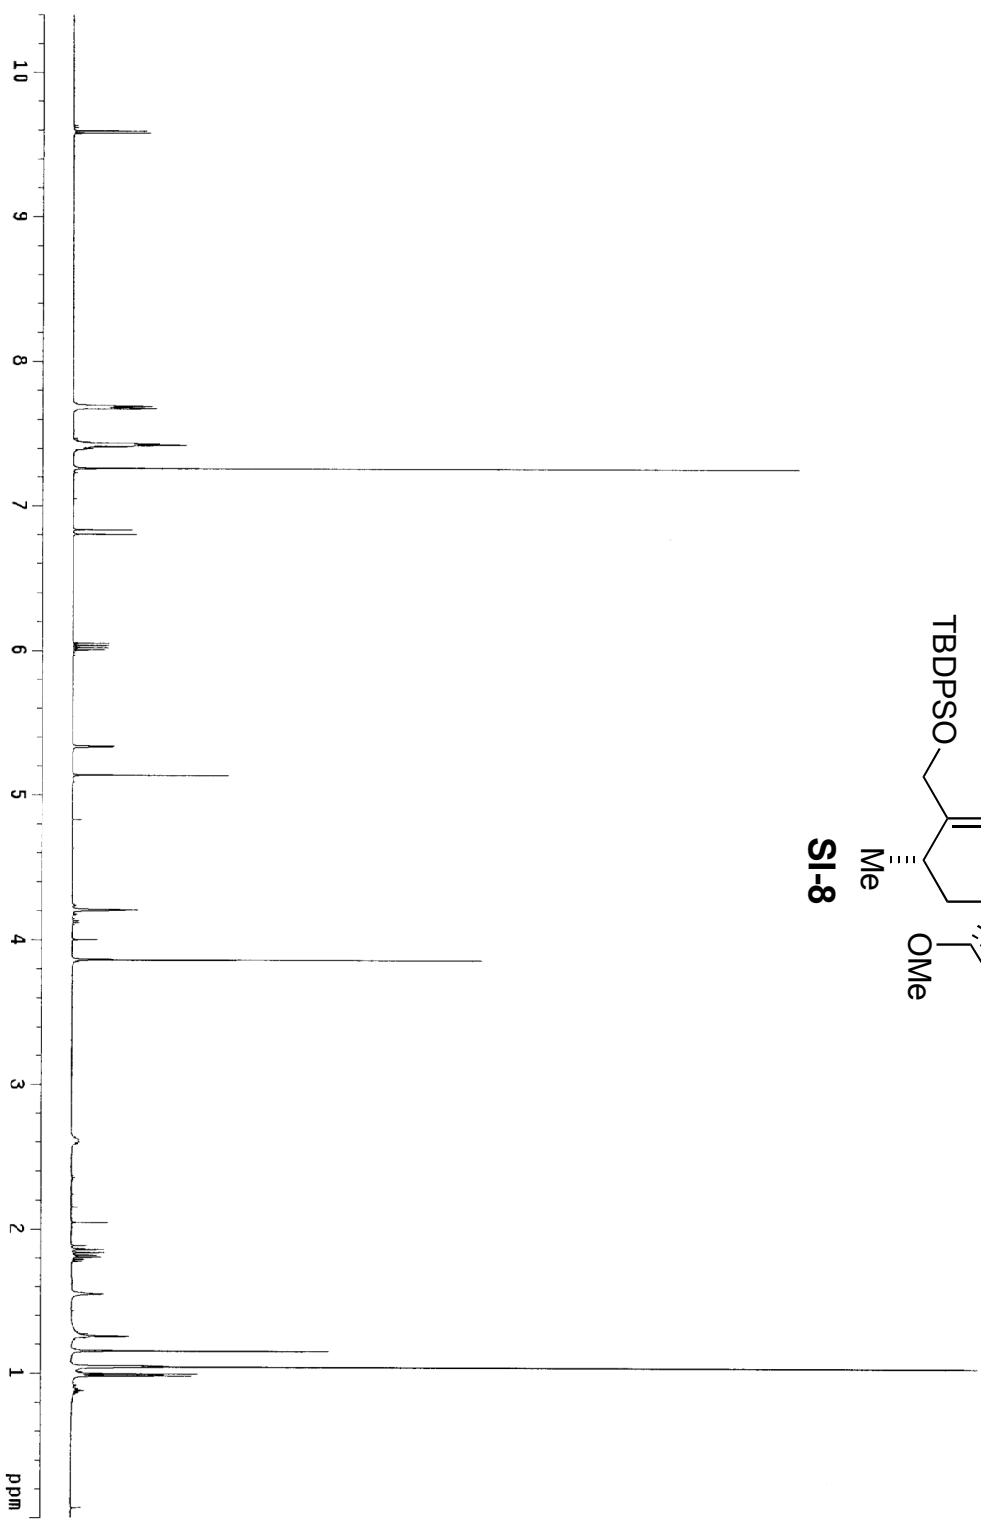

SI-28

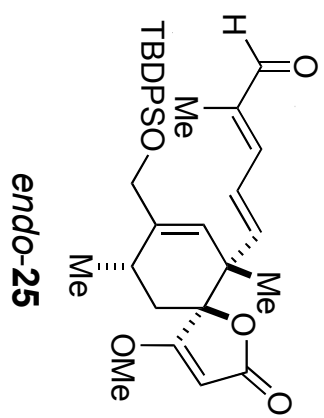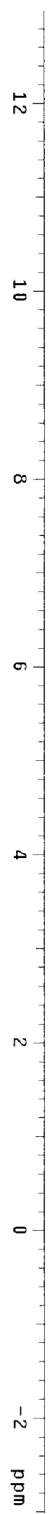

SI-29

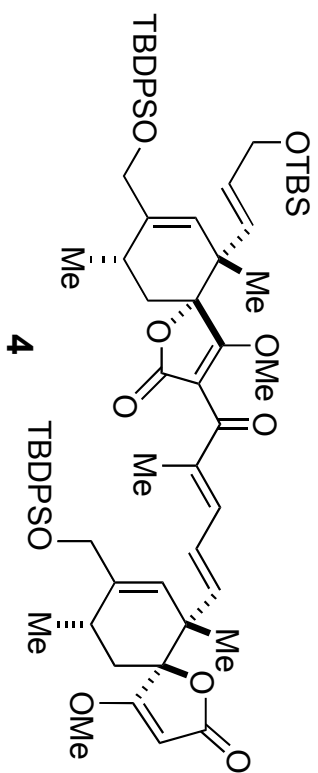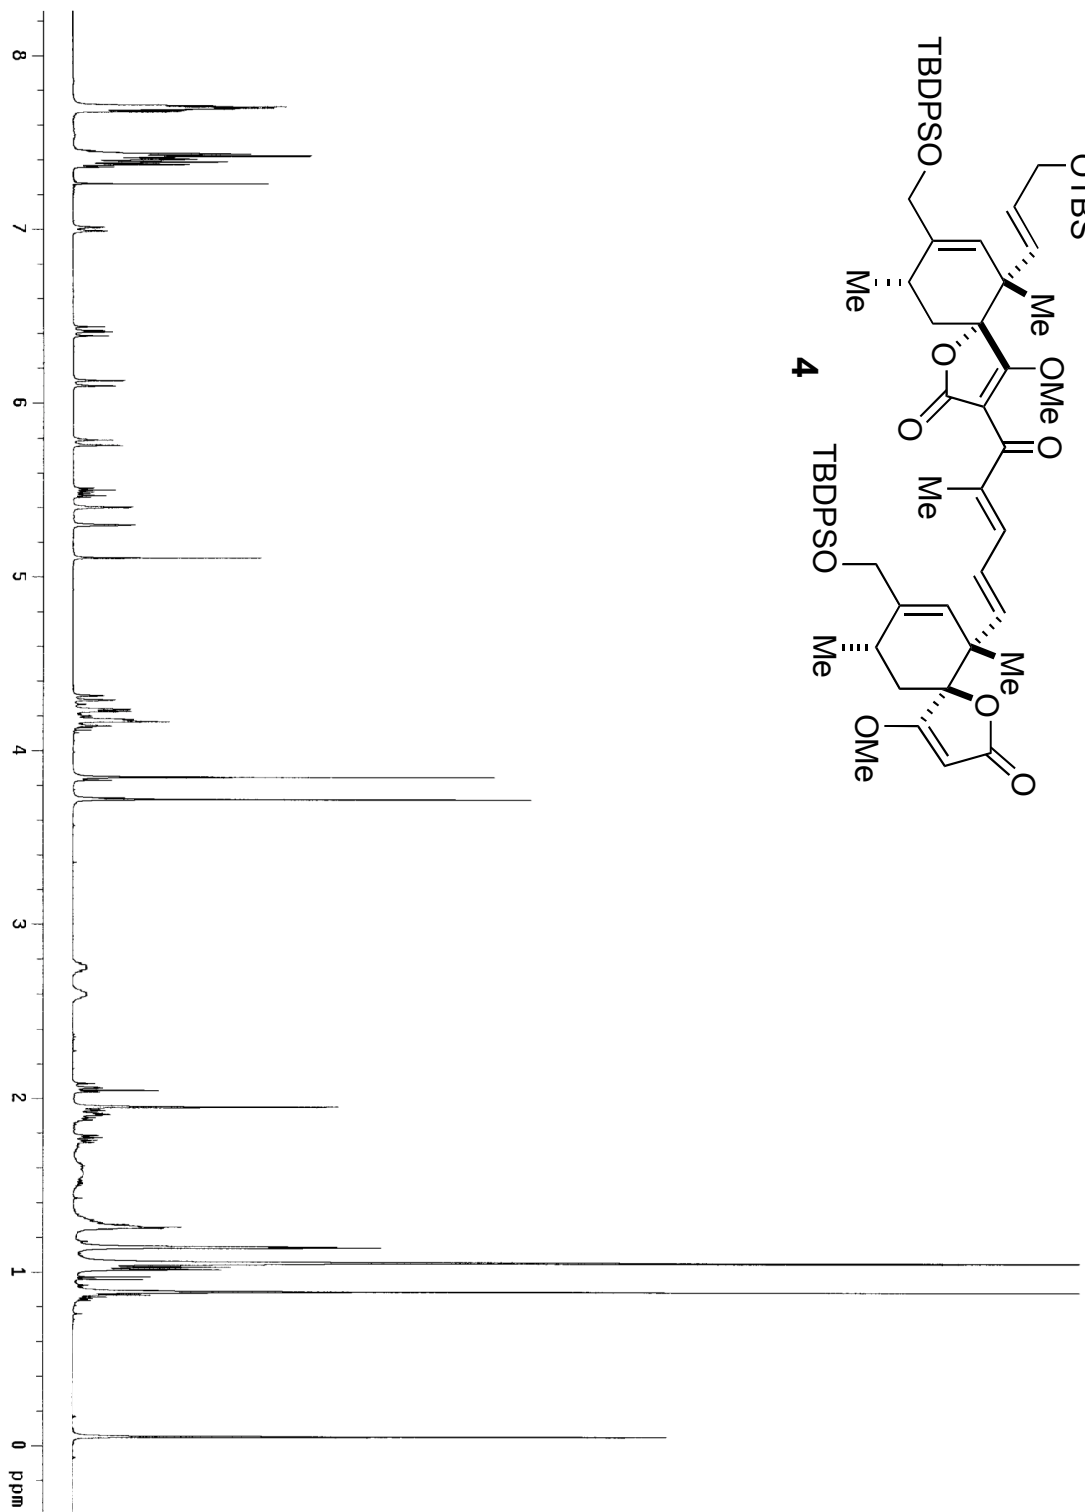



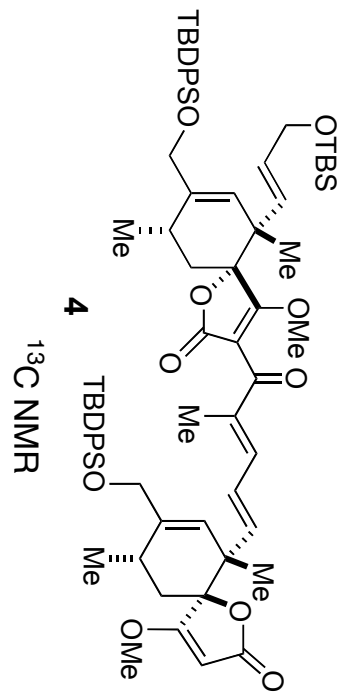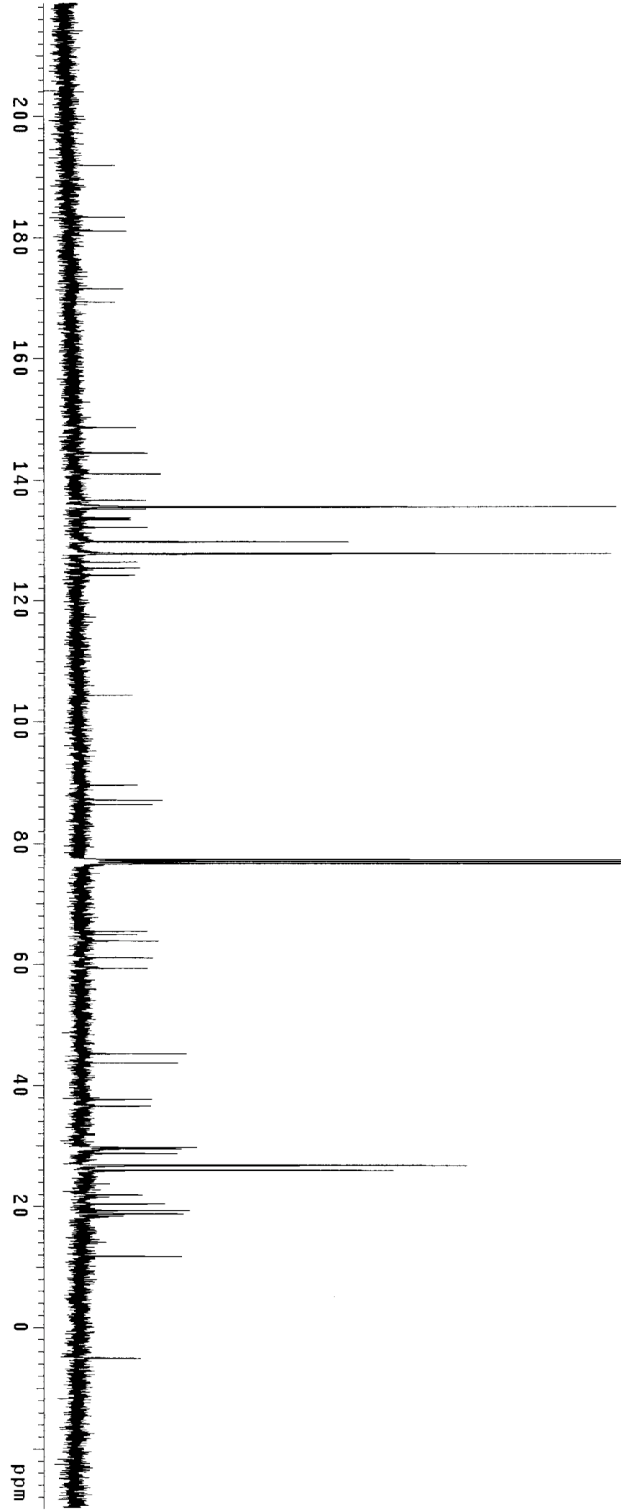



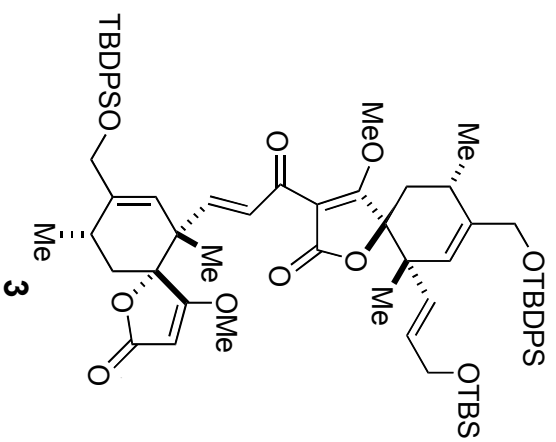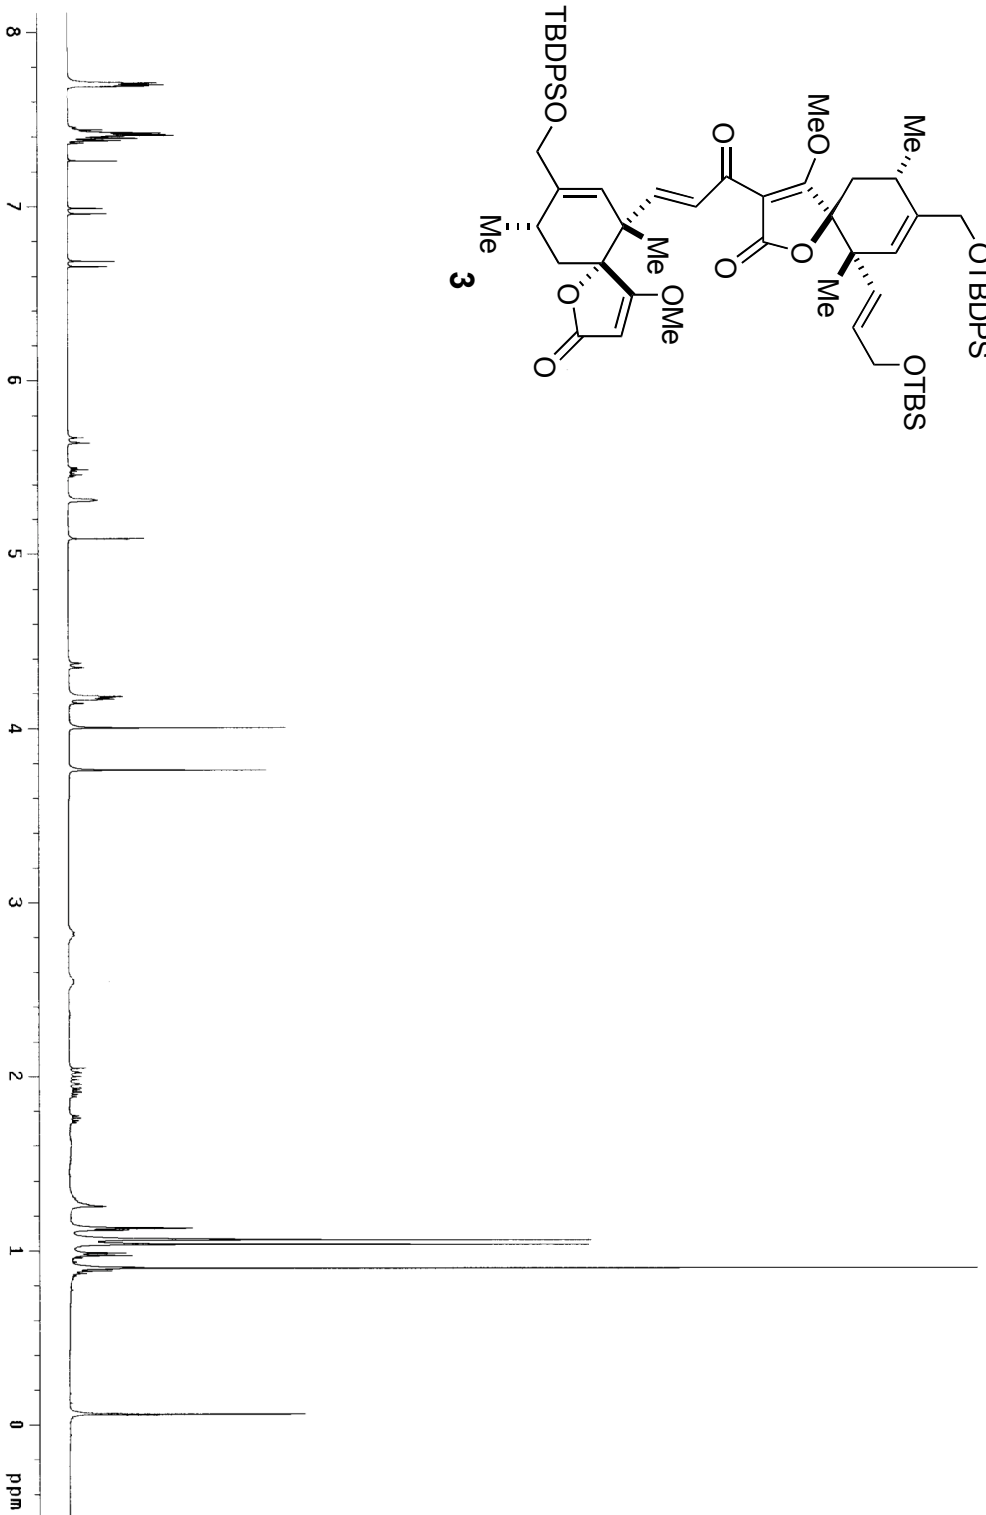

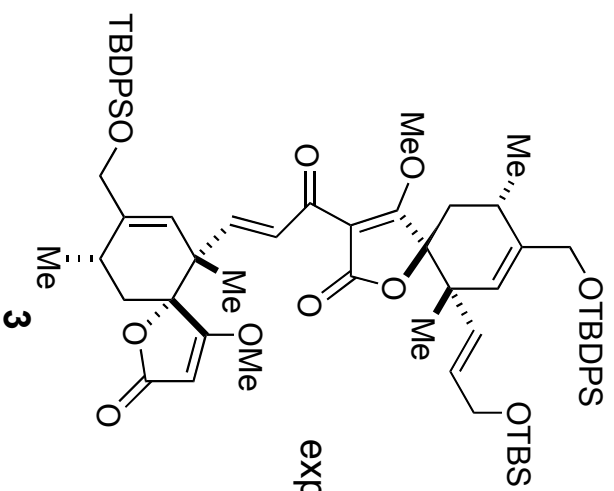

expansion of 5-7 ppm region

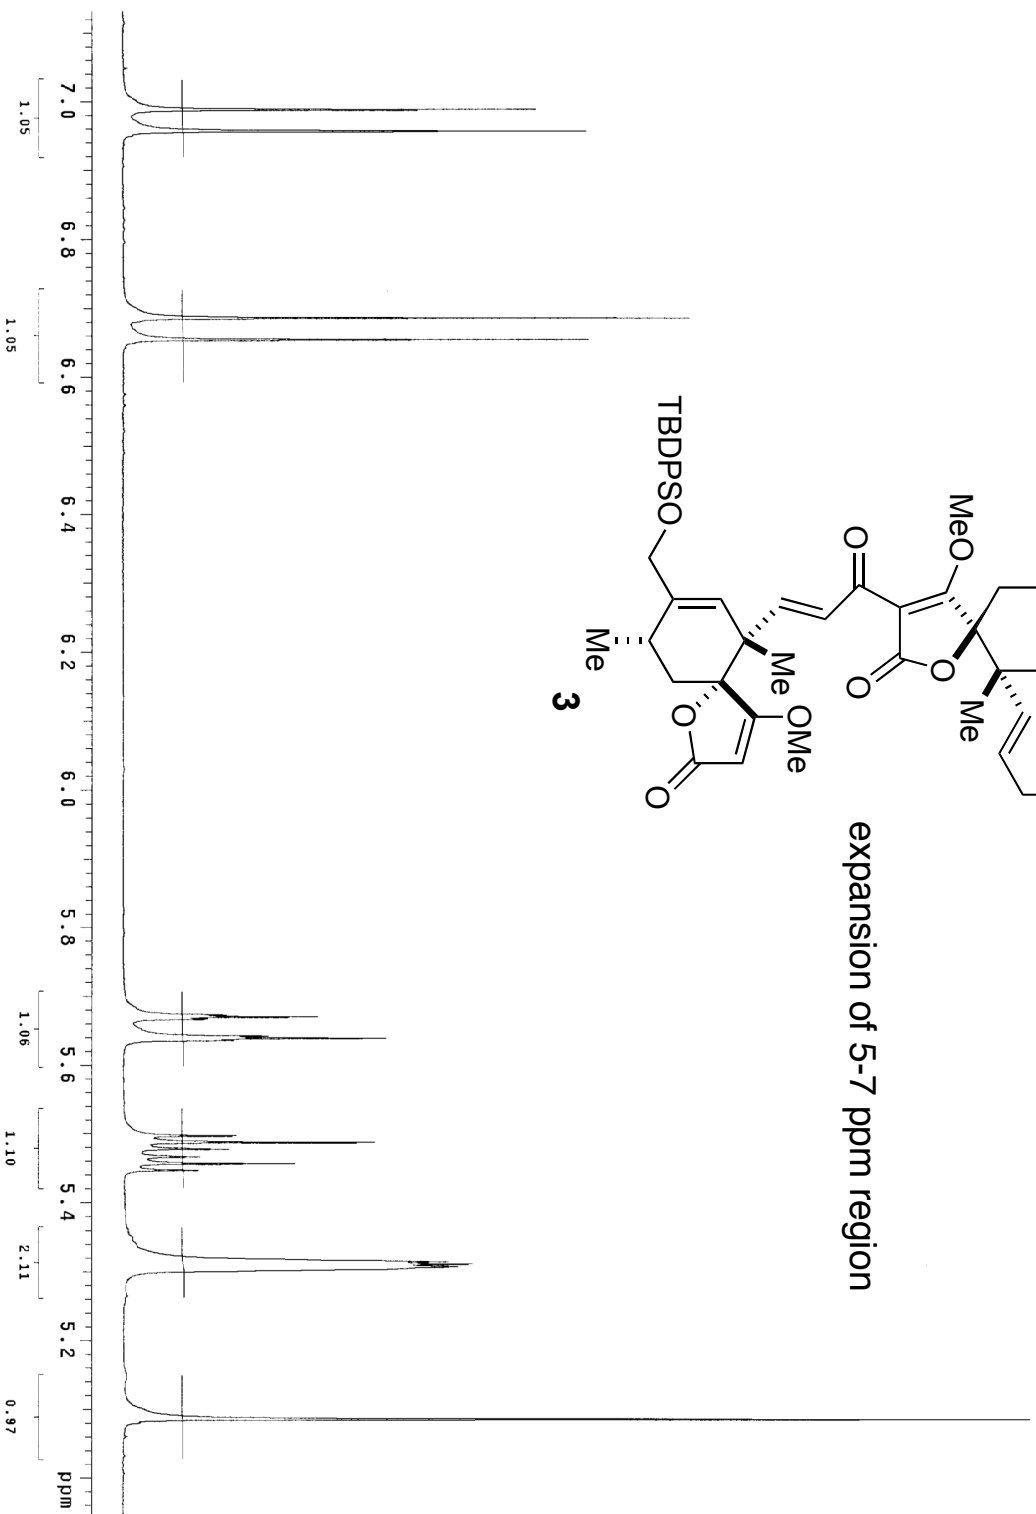

Supplement: NIHMS60240-supplement-SI.pdf [file NIHMS60240-supplement-SI.pdf]
